# Supplementary material for: Transcriptome of the Plant Virus Vector Graminella nigrifrons, and the Molecular Interactions of Maize fine streak rhabdovirus Transmission
Source: PubMed Central journal article supplement (PMC3395673; doi:10.1371/journal.pone.0040613), 2012-07-12

Supplementary figure S1.

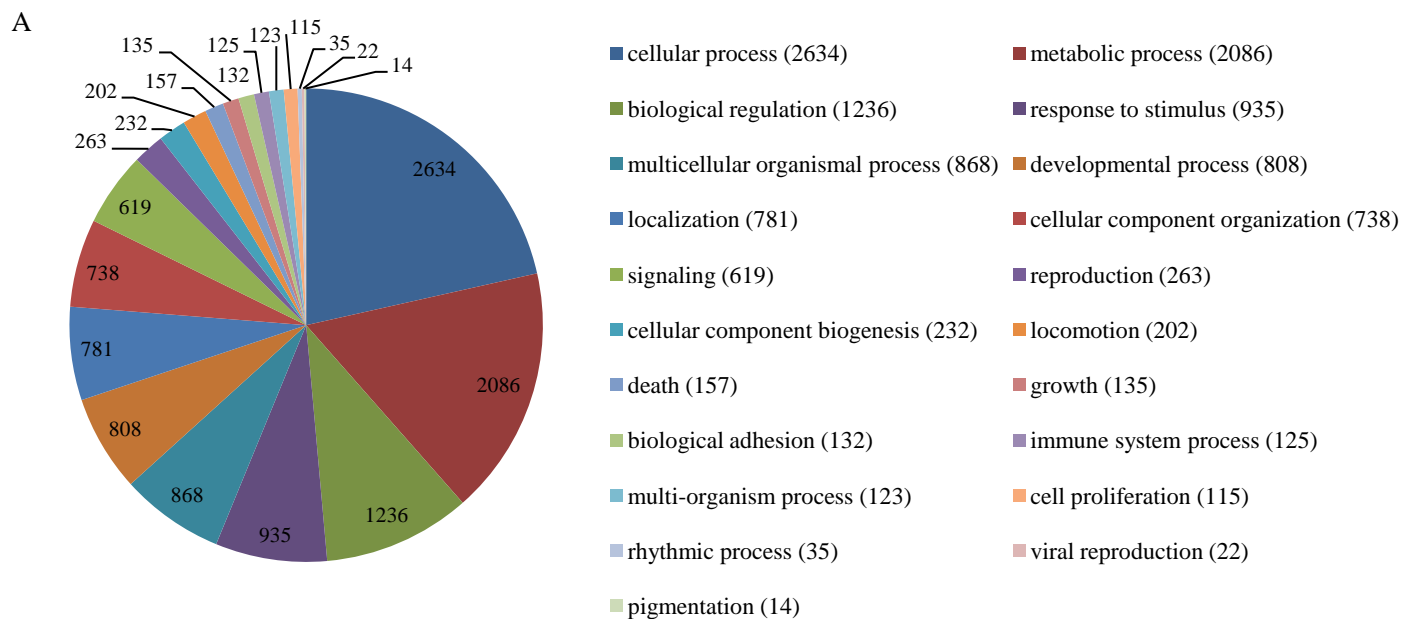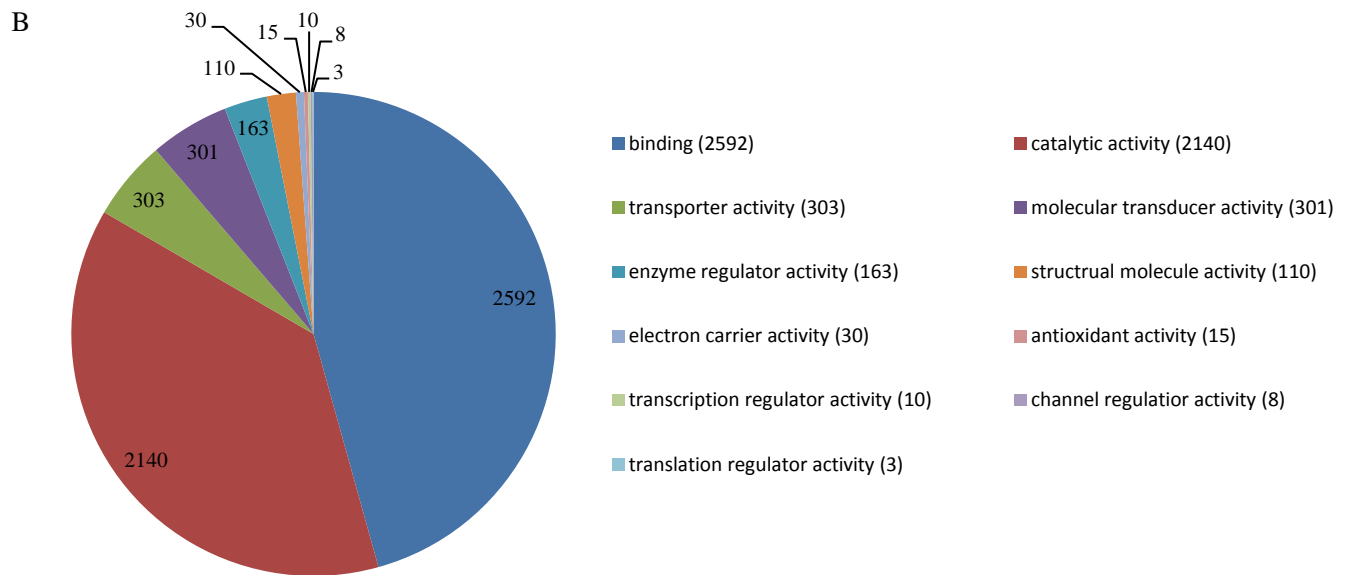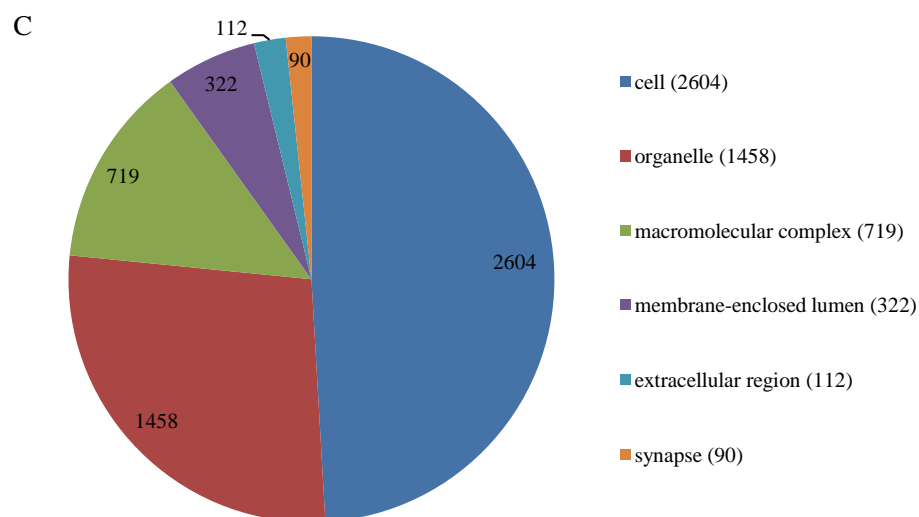

Supplement: pone.0040613.s001.pdf [file pone.0040613.s001.pdf]
