# Supplementary material for: Transcriptome of the Plant Virus Vector Graminella nigrifrons, and the Molecular Interactions of Maize fine streak rhabdovirus Transmission
Source: PLoS One. 2012 Jul 12;7(7):e40613. doi: 10.1371/journal.pone.0040613 (PMC3395673; doi:10.1371/journal.pone.0040613)
Supplement: Table S2 — G. nigrifrons ESTs that have the most significant alignment (E-value <10−180) with genes in the Swiss-Prot database. (XLSX) [file pone.0040613.s004.xlsx]

## Sheet: Sheet1
Sequence name	Sequence length	Hit organism	Hit desc.	Hit ACC	E-Value	Similarity	Score	Alignment length	Positives
GnigEST000004	5576	HUMAN	A disintegrin and metalloproteinase with thrombospondin motifs 9	279862	0	54	1111.67	1426	779
GnigEST000011	22147	MOUSE	Titin	350308	0	42	1977.99	6090	2615
GnigEST000025	7162	AEDAE	UPF0493 protein AAEL009648	318231	0	45	450.669	1354	615
GnigEST000029	5385	DROME	Cadherin-87A	207942	0	56	1046.96	1541	878
GnigEST000031	12295	HUMAN	Basement membrane-specific heparan sulfate proteoglycan core protein	304964	0	42	1064.68	2726	1168
GnigEST000038	5861	HUMAN	UPF0378 protein KIAA0100	305611	0	55	615.15	1021	565
GnigEST000073	7345	RABIT	Sortilin-related receptor	90496	0	47	1005.74	2217	1050
GnigEST000132	9749	HUMAN	DmX-like protein 2	343144	0	52	1839.31	3225	1702
GnigEST000135	12334	CHICK	Chromodomain-helicase-DNA-binding protein 7	331199	0	61	1409.82	1693	1042
GnigEST000136	1703	DROME	Tubulin alpha-1 chain	4870	0	96	537.339	277	266
GnigEST000218	2278	DROME	Protein roadkill	261329	0	90	675.626	399	362
GnigEST000305	6820	DROME	Spectrin alpha chain	152241	0	88	3517.63	2204	1946
GnigEST000308	1889	HUMAN	Dihydrolipoyl dehydrogenase, mitochondrial	6997	0	82	728.013	506	415
GnigEST000313	13699	MOUSE	E3 ubiquitin-protein ligase HUWE1	229572	0	54	994.571	1611	878
GnigEST000317	3383	DROME	Calcium-activated potassium channel slowpoke	247937	0	88	827.009	486	430
GnigEST000333	3537	MOUSE	Importin-7	195831	0	73	1181.01	1042	765
GnigEST000356	9643	CAEEL	Muscle M-line assembly protein unc-89	195356	0	43	823.543	2580	1128
GnigEST000371	12544	HUMAN	Spectrin beta chain, brain 4	73856	0	52	1332.39	2654	1399
GnigEST000375	1762	DROME	Putative inorganic phosphate cotransporter	49723	0	77	651.744	485	377
GnigEST000377	7227	MOUSE	Protein PIEZO2	440459	0	45	676.011	1757	796
GnigEST000402	1876	DROME	Leishmanolysin-like peptidase	243935	0	79	509.99	329	263
GnigEST000404	3179	HUMAN	Serine/threonine-protein kinase MRCK alpha	221997	0	65	880.167	960	624
GnigEST000432	3703	AEDAE	Mediator of RNA polymerase II transcription subunit 14	381296	0	71	1327	1211	865
GnigEST000452	2711	DROME	Phosphoenolpyruvate carboxykinase [GTP]	158575	0	78	859.751	617	483
GnigEST000457	3324	FUGRU	Valyl-tRNA synthetase	78834	0	74	1261.51	993	741
GnigEST000461	1761	DROME	Protein Malvolio	163899	0	76	634.41	535	407
GnigEST000471	3472	RABIT	Anion exchange protein 2	88787	0	58	772.696	1015	597
GnigEST000477	3084	HUMAN	Proteasome-associated protein ECM29 homolog	287664	0	56	686.026	1097	616
GnigEST000490	3460	XENLA	Ephrin type-A receptor 4-A	66582	0	61	841.262	988	607
GnigEST000508	3654	PONAB	Delta-1-pyrroline-5-carboxylate synthase	222936	0	71	769.615	734	524
GnigEST000521	1817	DROME	Protein Malvolio	163899	0	76	634.41	535	407
GnigEST000526	2916	MOUSE	Dolichyl-diphosphooligosaccharide--protein glycosyltransferase subunit STT3B	320756	0	83	1151.35	768	642
GnigEST000534	3238	DROME	Dual 3',5'-cyclic-AMP and -GMP phosphodiesterase 11	378273	0	86	1048.11	672	584
GnigEST000731	5017	MOUSE	E3 ubiquitin-protein ligase HUWE1	229572	0	91	726.857	421	384
GnigEST000745	6859	DROME	Dystrophin, isoforms A/C/F/G/H	325213	0	72	1398.26	1225	890
GnigEST000761	3392	RABIT	Very low-density lipoprotein receptor	87358	0	57	706.827	851	493
GnigEST000811	1960	CERCA	Glucose-6-phosphate 1-dehydrogenase	180438	0	81	736.487	508	412
GnigEST000842	4772	HUMAN	WD repeat-containing protein 7	194285	0	59	1126.69	1535	907
GnigEST000850	3504	CHICK	Dynamin-like 120 kDa protein, mitochondrial	305834	0	78	941.414	771	603
GnigEST000851	5234	BOMMO	Chromodomain-helicase-DNA-binding protein 1	386701	0	70	1479.54	1291	908
GnigEST000857	2721	HUMAN	WD repeat-containing protein 33	276359	0	79	697.582	500	395
GnigEST000858	1634	MANSE	Tubulin beta-1 chain	86590	0	95	825.854	426	407
GnigEST000861	6301	MOUSE	Kinesin-like protein KIF13A	95401	0	72	1539.63	1405	1021
GnigEST000875	2247	HUMAN	EH domain-containing protein 3	295126	0	83	776.163	534	444
GnigEST000881	4347	MOUSE	Diacylglycerol kinase theta	251537	0	59	718.768	940	562
GnigEST000890	3868	MOUSE	Importin-7	195831	0	72	1174.84	1055	766
GnigEST000891	3309	HUMAN	Probable cation-transporting ATPase 13A3	366403	0	58	746.888	1058	621
GnigEST000892	2336	DROME	Protein turtle	381558	0	86	680.633	413	358
GnigEST000897	4082	DROME	Calcium-activated potassium channel slowpoke	247937	0	82	1791.55	1196	981
GnigEST000903	3564	DROME	Vinculin	96849	0	76	919.457	754	579
GnigEST000910	7346	DROME	Neurogenic locus Notch protein	162589	0	69	3013.02	2343	1630
GnigEST000917	1445	XENLA	Tubulin beta-4 chain	171033	0	90	734.176	420	378
GnigEST000924	2439	DROME	Protein crooked neck	113786	0	83	1028.85	674	563
GnigEST000958	3941	DROME	ATP-dependent helicase brm	53904	0	82	863.603	590	489
GnigEST000962	14207	DROME	Dynein heavy chain, cytoplasmic	244108	0	87	7302.6	4642	4056
GnigEST000967	1701	DROME	Glutamate dehydrogenase, mitochondrial	117897	0	90	927.546	546	495
GnigEST000976	8866	HUMAN	Low-density lipoprotein receptor-related protein 2	353654	0	53	1481.85	2029	1090
GnigEST000986	5895	HUMAN	TATA-binding protein-associated factor 172	65821	0	61	1219.91	1478	902
GnigEST001017	2674	BOVIN	V-type proton ATPase 116 kDa subunit a isoform 1	150505	0	64	795.808	850	551
GnigEST001028	2598	MICME	Isocitrate dehydrogenase [NADP] cytoplasmic	66338	0	87	648.662	407	357
GnigEST001043	1865	XENTR	Selenium-binding protein 1	262383	0	80	647.506	471	380
GnigEST001048	4341	HUMAN	Protein TANC2	379343	0	61	870.152	1057	651
GnigEST001049	2177	DROME	Protein phosphatase PP2A 55 kDa regulatory subunit	179206	0	88	798.119	476	422
GnigEST001076	3090	MOUSE	Calcium-transporting ATPase type 2C member 1	67889	0	73	1041.18	891	658
GnigEST001093	3914	HUMAN	Regulatory-associated protein of mTOR	128999	0	65	1241.48	1319	870
GnigEST001103	5059	AEDAE	Protein KIAA0664 homolog	318329	0	81	1810.04	1305	1070
GnigEST001105	5957	HUMAN	Ankyrin-2	419518	0	72	1617.44	1441	1042
GnigEST001111	1768	DROME	Tubulin alpha-1 chain	4870	0	96	863.603	439	425
GnigEST001135	3067	DROME	Serine/threonine-protein kinase minibrain	99582	0	89	756.133	449	403
GnigEST001136	2580	XENTR	Ubiquitin-protein ligase E3B	330520	0	78	692.189	528	414
GnigEST001152	10333	MOUSE	Uncharacterized protein KIAA1109	438306	0	51	676.781	1550	792
GnigEST001162	1646	MANSE	Tubulin beta-1 chain	86590	0	93	811.601	430	404
GnigEST001170	14263	DROME	Titin	379694	0	82	6045.69	4142	3421
GnigEST001178	14095	HUMAN	E3 ubiquitin-protein ligase HUWE1	227225	0	69	1010.36	978	678
GnigEST001179	13973	HUMAN	Basement membrane-specific heparan sulfate proteoglycan core protein	304964	0	42	1061.6	2726	1166
GnigEST001195	4263	DROME	Brain tumor protein	77127	0	66	702.975	721	481
GnigEST001197	4171	RABIT	Anion exchange protein 2	88787	0	57	772.311	1040	601
GnigEST001202	3312	DROME	1-phosphatidylinositol-4,5-bisphosphate phosphodiesterase	245810	0	75	1375.15	1076	808
GnigEST001203	2351	RAT	Muskelin	49536	0	74	871.307	729	541
GnigEST001221	3539	HUMAN	WASH complex subunit strumpellin	245692	0	74	1285.4	1133	848
GnigEST001226	3634	FUGRU	Valyl-tRNA synthetase	78834	0	81	1055.82	697	571
GnigEST001243	2312	DROME	Polypeptide N-acetylgalactosaminyltransferase 5	45913	0	78	874.389	633	495
GnigEST001245	3207	BOVIN	Alpha-aminoadipic semialdehyde synthase, mitochondrial	379356	0	70	941.028	909	645
GnigEST001255	4733	HUMAN	Chromodomain-helicase-DNA-binding protein 7	331834	0	65	1186.79	1226	808
GnigEST001261	2490	HUMAN	Kinesin-like protein KIF16B	205516	0	65	657.136	741	485
GnigEST001264	2517	RAT	Lysosomal alpha-glucosidase	300919	0	59	497.278	576	344
GnigEST001267	1749	DROME	Protein mothers against dpp	138385	0	78	689.493	459	362
GnigEST001276	6768	LOCMI	Apolipophorins	371701	0	51	1039.64	2026	1041
GnigEST001291	15721	HUMAN	E3 ubiquitin-protein ligase UBR4	290818	0	65	2490.69	2722	1777
GnigEST001292	1967	HUMAN	Dihydrolipoyl dehydrogenase, mitochondrial	6997	0	78	714.146	532	416
GnigEST001293	5078	DROME	Disco-interacting protein 2	103789	0	77	1934.46	1453	1132
GnigEST001299	8513	MOUSE	E3 ubiquitin-protein ligase HECTD1	440200	0	76	1118.61	872	671
GnigEST001301	4677	DROME	Calsyntenin-1	138711	0	60	739.954	922	555
GnigEST001306	2107	CERCA	Glucose-6-phosphate 1-dehydrogenase	180438	0	77	728.013	537	415
GnigEST001313	2570	MOUSE	Transformation/transcription domain-associated protein	285580	0	76	642.499	508	390
GnigEST001314	2174	PONAB	Aldehyde dehydrogenase, mitochondrial	222309	0	75	690.263	536	406
GnigEST001320	1772	DROME	Selenide, water dikinase	181526	0	92	679.478	394	364
GnigEST001321	8720	HUMAN	Baculoviral IAP repeat-containing protein 6	440663	0	65	756.518	812	534
GnigEST001326	10161	HUMAN	Prolow-density lipoprotein receptor-related protein 1	357792	0	56	2182.91	2741	1543
GnigEST001332	3346	DROME	Protein furry	248083	0	64	791.956	787	507
GnigEST001334	4667	HUMAN	Nuclear pore complex protein Nup205	439664	0	47	699.123	1634	780
GnigEST001336	2430	HUMAN	Neurogenic locus notch homolog protein 2	298437	0	68	615.92	460	315
GnigEST001341	2015	BOVIN	Brefeldin A-inhibited guanine nucleotide-exchange protein 1	88104	0	76	524.242	409	313
GnigEST001352	4296	DROME	Brain tumor protein	77127	0	66	702.975	721	481
GnigEST001357	2539	MOUSE	Anaphase-promoting complex subunit 1	74817	0	65	791.186	847	558
GnigEST001360	1967	DROME	Leishmanolysin-like peptidase	243935	0	78	497.664	329	257
GnigEST001373	2999	CULQU	Moesin/ezrin/radixin homolog 1	391051	0	81	849.351	572	466
GnigEST001376	16232	HUMAN	E3 ubiquitin-protein ligase UBR4	290818	0	65	3119.72	3327	2195
GnigEST001380	8160	DROME	Ryanodine receptor 44F	54659	0	85	2328.13	1524	1298
GnigEST001383	7572	HUMAN	Protein PIEZO2	437948	0	48	674.855	1530	743
GnigEST001384	8767	MOUSE	E3 ubiquitin-protein ligase HECTD1	440200	0	76	1179.47	916	705
GnigEST001385	9207	HUMAN	E3 ubiquitin-protein ligase UBR5	277042	0	59	1093.57	1442	854
GnigEST001388	8837	HUMAN	Baculoviral IAP repeat-containing protein 6	440663	0	65	756.518	812	532
GnigEST001393	4240	HUMAN	WD repeat-containing protein 7	194285	0	53	640.958	1087	580
GnigEST001394	3946	RAT	Tuberin	244796	0	60	674.47	918	554
GnigEST001396	4814	MOUSE	Kinesin-like protein KIF13A	95401	0	68	685.256	717	488
GnigEST001402	4120	DROME	Histone-lysine N-methyltransferase trr	241974	0	76	702.975	539	413
GnigEST001410	2763	DROME	TBC1 domain family member CG11727	261805	0	71	820.076	770	549
GnigEST001417	7093	HUMAN	Laminin subunit beta-1	19915	0	53	721.465	1061	565
GnigEST001440	1456	DROME	Tubulin alpha-1 chain	4870	0	97	855.129	432	420
GnigEST001445	5636	DROME	Clathrin heavy chain	78204	0	89	2802.7	1672	1502
GnigEST001449	13011	DROME	Titin	379694	0	83	4594.26	3088	2572
GnigEST001450	14309	DROME	Titin	379694	0	83	4501.43	2994	2509
GnigEST001456	9259	HUMAN	E3 ubiquitin-protein ligase UBR5	277042	0	58	1032.71	1438	838
GnigEST001457	4647	DROME	Inositol hexakisphosphate and diphosphoinositol-pentakisphosphate kinase	424128	0	85	745.732	469	401
GnigEST001466	2641	PONAB	Putative pre-mRNA-splicing factor ATP-dependent RNA helicase DHX15	305388	0	91	1162.52	680	621
GnigEST001474	6338	HUMAN	Probable E3 ubiquitin-protein ligase HERC1	344756	0	63	1588.93	1785	1125
GnigEST001478	3142	MOUSE	Importin-11	167557	0	62	771.541	938	582
GnigEST001482	3310	DROME	Probable multidrug resistance-associated protein lethal(2)03659	196603	0	59	635.95	842	504
GnigEST001486	2031	BOVIN	Brefeldin A-inhibited guanine nucleotide-exchange protein 1	88104	0	74	755.362	606	453
GnigEST001521	3075	CHICK	Cytoplasmic aconitate hydratase	154397	0	76	1195.26	936	714
GnigEST001530	3159	DROME	Putative U5 small nuclear ribonucleoprotein 200 kDa helicase	247873	0	91	1137.48	667	611
GnigEST001534	3865	HUMAN	Adenylate cyclase type 1	13054	0	61	827.009	1000	615
GnigEST001539	1995	DROME	Organic cation transporter protein	245275	0	75	655.981	533	402
GnigEST001544	4241	DROME	Neurogenic locus Notch protein	162589	0	82	1194.49	681	563
GnigEST001546	4237	DROME	Brain tumor protein	77127	0	66	702.975	721	481
GnigEST001562	3508	BOVIN	V-type proton ATPase 116 kDa subunit a isoform 1	150505	0	67	875.159	877	596
GnigEST001568	5474	DROME	MAP kinase-activating death domain protein	247968	0	63	1555.04	1698	1077
GnigEST001574	7189	DROME	Laminin subunit beta-1	246719	0	62	1507.66	1564	981
GnigEST001592	3066	CULQU	Moesin/ezrin/radixin homolog 1	391051	0	81	849.351	572	466
GnigEST001600	15965	HUMAN	E3 ubiquitin-protein ligase UBR4	290818	0	61	4159.76	5325	3259
GnigEST001602	3740	DROME	Maternal protein pumilio	169463	0	60	661.759	737	447
GnigEST001604	3582	DROME	ATP-dependent RNA helicase bel	240422	0	83	696.427	491	411
GnigEST001605	11890	HUMAN	Basement membrane-specific heparan sulfate proteoglycan core protein	304964	0	42	1098.96	2685	1152
GnigEST001606	12202	HUMAN	Basement membrane-specific heparan sulfate proteoglycan core protein	304964	0	42	1061.6	2726	1166
GnigEST001607	12064	HUMAN	Basement membrane-specific heparan sulfate proteoglycan core protein	304964	0	43	1147.88	2794	1225
GnigEST001608	12454	HUMAN	Basement membrane-specific heparan sulfate proteoglycan core protein	304964	0	42	1061.6	2726	1166
GnigEST001616	6789	XENLA	Lysine-specific demethylase 3A-A	302046	0	56	660.218	871	495
GnigEST001619	3265	DROME	Myosin-IA	64815	0	75	1217.99	1010	760
GnigEST001620	9157	HUMAN	E3 ubiquitin-protein ligase UBR5	277042	0	59	1093.57	1442	860
GnigEST001622	6179	DROME	DNA-directed RNA polymerase II subunit RPB1	65063	0	92	2682.52	1513	1399
GnigEST001629	2438	HUMAN	5'-AMP-activated protein kinase catalytic subunit alpha-2	73814	0	71	664.455	561	399
GnigEST001632	3475	DROME	E3 ubiquitin-protein ligase Bre1	185492	0	71	692.575	623	445
GnigEST001647	2839	DROME	TBC1 domain family member CG11727	261805	0	73	833.943	734	543
GnigEST001648	2867	MOUSE	Triple functional domain protein	437827	0	59	786.949	1012	607
GnigEST001653	2206	BOVIN	Brefeldin A-inhibited guanine nucleotide-exchange protein 1	88104	0	70	779.63	680	481
GnigEST001654	2550	MOUSE	Protein kinase C iota type	355733	0	78	681.404	488	381
GnigEST001656	1570	DROME	Nicotinate phosphoribosyltransferase	244130	0	81	660.988	466	381
GnigEST001662	3046	SCHAM	Annulin	143318	0	82	716.072	497	412
GnigEST001665	5720	HUMAN	Nuclear pore complex protein Nup205	439664	0	50	957.592	1987	1007
GnigEST001685	1601	DROME	Glutamate dehydrogenase, mitochondrial	117897	0	87	841.647	532	468
GnigEST001686	4055	BOVIN	NAD(P) transhydrogenase, mitochondrial	277975	0	80	734.947	536	430
GnigEST001689	2429	DROME	Calpain-B	170984	0	77	913.294	699	539
GnigEST001690	6005	DROME	Collagen alpha-1(IV) chain	247875	0	43	773.081	1300	563
GnigEST001691	7582	MOUSE	NFX1-type zinc finger-containing protein 1	312111	0	50	652.514	1255	630
GnigEST001692	12314	HUMAN	Basement membrane-specific heparan sulfate proteoglycan core protein	304964	0	43	1147.5	2794	1223
GnigEST001703	2200	HUMAN	5'-AMP-activated protein kinase catalytic subunit alpha-2	73814	0	72	662.144	548	396
GnigEST001705	3425	DROME	E3 ubiquitin-protein ligase Bre1	185492	0	75	1263.06	1045	784
GnigEST001706	2011	DROME	Puff-specific protein Bx42	69559	0	74	674.085	528	393
GnigEST001708	3056	MOUSE	Symplekin	85485	0	60	766.918	1027	624
GnigEST001710	4683	HUMAN	Ankyrin-2	419518	0	77	1248.03	1023	788
GnigEST001717	2576	DROME	Probable elongator complex protein 2	244921	0	61	668.307	832	510
GnigEST001729	4092	HUMAN	Leucyl-tRNA synthetase, cytoplasmic	87924	0	74	1422.91	1176	877
GnigEST001741	2936	SCHAM	Annulin	143318	0	79	1009.59	748	597
GnigEST001742	2197	BOVIN	Pyruvate dehydrogenase phosphatase regulatory subunit, mitochondrial	277656	0	65	663.3	711	468
GnigEST001767	3678	HUMAN	Importin subunit beta-1	77292	0	83	1212.59	874	726
GnigEST001774	14361	DROME	Dynein heavy chain, cytoplasmic	244108	0	87	7391.2	4663	4100
GnigEST001777	3001	HUMAN	SWI/SNF complex subunit SMARCC2	155131	0	68	816.609	749	511
GnigEST001778	8563	MOUSE	E3 ubiquitin-protein ligase HECTD1	440200	0	78	1777.3	1345	1057
GnigEST001779	8239	MOUSE	E3 ubiquitin-protein ligase HECTD1	440200	0	78	1777.3	1345	1057
GnigEST001780	8767	MOUSE	E3 ubiquitin-protein ligase HECTD1	440200	0	78	1777.3	1345	1057
GnigEST001781	8695	MOUSE	E3 ubiquitin-protein ligase HECTD1	440200	0	78	1838.16	1389	1091
GnigEST001787	8791	HUMAN	Baculoviral IAP repeat-containing protein 6	440663	0	65	756.518	812	532
GnigEST001792	3626	MOUSE	V-type proton ATPase 116 kDa subunit a isoform 1	167940	0	70	882.863	844	591
GnigEST001796	6319	HUMAN	HEAT repeat-containing protein 5B	277830	0	65	1923.29	2093	1372
GnigEST001805	4235	CHICK	DNA-directed RNA polymerase III subunit RPC1	305658	0	80	1862.04	1390	1118
GnigEST001806	3965	DROME	ATP-dependent helicase brm	53904	0	77	1528.84	1154	889
GnigEST001808	2171	DROME	Protein phosphatase PP2A 55 kDa regulatory subunit	179206	0	90	776.548	441	399
GnigEST001812	2167	DROME	Organic cation transporter protein	245275	0	75	655.981	533	401
GnigEST001821	3107	MOUSE	Anaphase-promoting complex subunit 1	74817	0	63	877.085	1019	649
GnigEST001823	4009	CAEEL	TPR repeat-containing protein B0464.2	108529	0	60	317.005	393	239
GnigEST001825	3365	BOVIN	Cleavage and polyadenylation specificity factor subunit 1	91578	0	68	1131.32	1154	789
GnigEST001826	2163	BOVIN	Brefeldin A-inhibited guanine nucleotide-exchange protein 1	88104	0	73	793.882	654	481
GnigEST001829	3179	DANRE	Uncharacterized protein KIAA0564 homolog	394277	0	67	987.638	1023	692
GnigEST001865	2454	DROME	Protein roadkill	261329	0	90	675.626	399	362
GnigEST001876	5294	BOMMO	DNA topoisomerase 2	87803	0	77	1131.32	876	682
GnigEST001951	2669	MOUSE	H(+)/Cl(-) exchange transporter 3	156058	0	68	829.706	775	529
GnigEST002030	3898	HUMAN	Regulatory-associated protein of mTOR	128999	0	64	1211.82	1331	859
GnigEST002052	4798	DROME	Histone-lysine N-methyltransferase trr	241974	0	76	702.975	539	413
GnigEST002080	1676	DROME	Glutamate dehydrogenase, mitochondrial	117897	0	89	893.649	546	488
GnigEST002085	4985	DROME	Disco-interacting protein 2	103789	0	77	1934.46	1453	1132
GnigEST002093	4857	HUMAN	Plasma membrane calcium-transporting ATPase 3	294703	0	72	1346.64	1181	858
GnigEST002096	2690	MOUSE	Dolichyl-diphosphooligosaccharide--protein glycosyltransferase subunit STT3B	320756	0	83	1100.89	736	612
GnigEST002102	4173	MOUSE	Nuclear pore complex protein Nup155	135838	0	62	688.723	870	542
GnigEST002104	5139	CAEEL	Unconventional myosin heavy chain 6	242378	0	58	654.055	958	557
GnigEST002105	5110	DROPS	Myosin-VIIa	21507	0	63	801.971	956	610
GnigEST002115	2711	DROME	Protein retinal degeneration B	76280	0	84	722.62	493	416
GnigEST002161	4854	DROME	Disco-interacting protein 2	103789	0	74	1974.13	1618	1204
GnigEST002170	5030	DROME	Dystrophin, isoforms A/C/F/G/H	325213	0	71	1394.02	1253	893
GnigEST002176	2772	RAT	Sarcosine dehydrogenase, mitochondrial	52886	0	68	915.22	893	611
GnigEST002188	1821	XENTR	Ubiquitin-protein ligase E3B	330520	0	75	679.093	548	413
GnigEST002210	3429	DROME	Inositol hexakisphosphate and diphosphoinositol-pentakisphosphate kinase	424128	0	78	1566.59	1136	891
GnigEST002250	3398	RAT	Long-chain-fatty-acid--CoA ligase 3	86427	0	65	634.795	692	456
GnigEST002253	12381	HUMAN	Basement membrane-specific heparan sulfate proteoglycan core protein	304964	0	42	1061.6	2726	1166
GnigEST002261	3047	RAT	Lon protease homolog, mitochondrial	165942	0	75	1083.94	866	657
GnigEST002262	7596	MOUSE	NFX1-type zinc finger-containing protein 1	312111	0	50	649.432	1255	632
GnigEST002290	7448	MOUSE	NFX1-type zinc finger-containing protein 1	312111	0	50	652.514	1255	630
GnigEST002293	1940	DROME	Stress-activated protein kinase JNK	243939	0	95	659.062	355	338
GnigEST002298	3838	HUMAN	Probable E3 ubiquitin-protein ligase MYCBP2	221985	0	67	1280	1213	824
GnigEST002299	1843	DROME	Protein pellino	51325	0	84	640.188	428	361
GnigEST002305	2286	DROME	F-box/WD repeat-containing protein 7	58632	0	87	793.497	485	422
GnigEST002329	12131	HUMAN	Basement membrane-specific heparan sulfate proteoglycan core protein	304964	0	42	1098.96	2685	1152
GnigEST002418	3097	AEDAE	Mediator of RNA polymerase II transcription subunit 24	318235	0	61	749.969	986	605
GnigEST002420	2668	CHICK	DNA replication licensing factor MCM3	304468	0	73	882.093	777	572
GnigEST002429	5566	HUMAN	Myosin-Va	331212	0	53	736.873	1205	647
GnigEST002465	1584	MOUSE	Signal recognition particle 54 kDa protein	145224	0	93	836.639	489	459
GnigEST002471	9291	DROME	Protein furry	248083	0	66	2687.52	2645	1752
GnigEST002473	3227	DROME	Alpha-actinin, sarcomeric	158933	0	91	1604.73	915	836
GnigEST002491	2471	HUMAN	Pre-mRNA-splicing factor ATP-dependent RNA helicase PRP16	150833	0	87	1194.1	752	660
GnigEST002511	8973	DROME	Ryanodine receptor 44F	54659	0	87	2808.09	1778	1548
GnigEST002539	2521	CHICK	Myotubularin-related protein 8	229280	0	75	650.203	529	397
GnigEST002553	2404	MOUSE	Prolyl endopeptidase	125624	0	75	904.434	708	536
GnigEST002582	3079	DROME	Tyrosine-protein kinase PR2	79647	0	57	681.404	900	521
GnigEST002598	3804	MOUSE	Probable cation-transporting ATPase 13A3	256943	0	57	702.205	1075	622
GnigEST002605	7327	MOUSE	Plexin-A2	326168	0	57	1358.2	1965	1124
GnigEST002616	4257	HUMAN	Ankyrin repeat and FYVE domain-containing protein 1	194990	0	63	1019.22	1200	766
GnigEST002629	2103	BOVIN	Asparaginyl-tRNA synthetase, cytoplasmic	284644	0	78	787.719	559	438
GnigEST002633	3302	BOVIN	Insulin-degrading enzyme	308975	0	72	1091.64	967	698
GnigEST002635	3666	AEDAE	Mediator of RNA polymerase II transcription subunit 23	318181	0	79	1596.25	1179	942
GnigEST002645	3453	DROME	Rho GTPase-activating protein 190	246095	0	66	510.76	582	385
GnigEST002680	2786	HUMAN	Cell division cycle protein 27 homolog	82683	0	60	679.478	863	522
GnigEST002682	5968	DROME	MAP kinase-activating death domain protein	247968	0	59	824.313	982	585
GnigEST002684	3739	HUMAN	Tankyrase-2	62712	0	86	1165.98	771	668
GnigEST002685	14546	HUMAN	Low-density lipoprotein receptor-related protein 2	353654	0	55	3462.16	4677	2612
GnigEST002687	3265	DROME	Integrin alpha-PS2	241009	0	63	778.089	876	554
GnigEST002698	3178	MOUSE	Serine/threonine-protein phosphatase 6 regulatory ankyrin repeat subunit A	252888	0	61	804.668	975	597
GnigEST002705	3908	DROME	Neuropathy target esterase sws	166940	0	69	1063.91	1005	695
GnigEST002708	2128	DROPS	CTP synthase	424469	0	74	767.303	618	459
GnigEST002722	3235	MOUSE	Elongation factor Tu GTP-binding domain-containing protein 1	290592	0	67	1106.66	1144	773
GnigEST002726	2559	CHICK	Tyrosine-protein phosphatase non-receptor type 11	148902	0	81	429.869	308	250
GnigEST002730	4650	DROME	Papilin	327856	0	59	786.178	759	450
GnigEST002739	2840	MOUSE	H(+)/Cl(-) exchange transporter 7	99891	0	62	643.269	729	458
GnigEST002741	6176	DROME	Tyrosine-protein phosphatase 10D	234431	0	72	1873.21	1555	1132
GnigEST002756	2409	DROME	Serine/threonine-protein kinase tricorner	278222	0	93	804.283	448	420
GnigEST002759	1848	DROME	Flotillin-1	72910	0	84	637.106	424	360
GnigEST002764	1917	HUMAN	RCC1 and BTB domain-containing protein 1	171287	0	75	635.95	514	386
GnigEST002785	4169	DROME	Cytoplasmic FMR1-interacting protein	245180	0	89	2160.57	1290	1158
GnigEST002803	2074	DROME	Protein ariadne-1	55627	0	81	778.089	507	414
GnigEST002812	3400	DROME	DNA polymerase delta catalytic subunit	160547	0	81	1517.29	1072	872
GnigEST002815	2028	CHICK	DNA (cytosine-5)-methyltransferase 1	57634	0	75	870.152	672	507
GnigEST002849	2348	DROME	Catalase	134747	0	79	716.842	503	400
GnigEST002868	4415	HUMAN	THO complex subunit 2	353306	0	63	1120.53	1297	830
GnigEST002897	3348	PONAB	Rab GTPase-activating protein 1-like	304999	0	61	640.958	860	528
GnigEST002910	2125	MOUSE	Transketolase-like protein 2	289973	0	75	759.985	616	468
GnigEST002934	2810	HUMAN	Periodic tryptophan protein 2 homolog	134851	0	66	863.218	902	598
GnigEST002961	1938	HUMAN	Phosphorylase b kinase regulatory subunit alpha, liver isoform	104039	0	75	570.081	482	362
GnigEST002967	6594	DROME	Putative U5 small nuclear ribonucleoprotein 200 kDa helicase	247873	0	86	3364.7	2149	1867
GnigEST002968	3705	BOVIN	Probable phospholipid-transporting ATPase IIB	268318	0	77	1359.36	1106	853
GnigEST002974	2665	DROME	Protein vav	102568	0	67	764.607	817	550
GnigEST002977	3887	HUMAN	Structural maintenance of chromosomes protein 1A	172498	0	70	989.949	1021	716
GnigEST003007	1584	ID	DDB1- and CUL4-associated factor 7	97226	0	92	634.024	347	322
GnigEST003130	1813	ANOGA	Probable 26S proteasome non-ATPase regulatory subunit 3	21557	0	79	654.825	503	398
GnigEST003140	3543	HOMAM	Guanine nucleotide-binding protein G(I)/G(S)/G(T) subunit beta-1	159748	0	97	664.455	340	331
GnigEST003157	4939	MOUSE	Probable phospholipid-transporting ATPase IA	101712	0	73	1218.76	1053	775
GnigEST003170	2896	HUMAN	Liprin-alpha-1	181652	0	64	833.558	928	602
GnigEST003172	2817	HUMAN	N-alpha-acetyltransferase 15, NatA auxiliary subunit	134852	0	72	983.015	851	614
GnigEST003181	2079	XENLA	Cytosolic purine 5'-nucleotidase	302653	0	76	680.633	548	418
GnigEST003196	2446	DROME	cGMP-dependent protein kinase, isozyme 2 forms cD4/T1/T3A/T3B	115600	0	83	1049.65	710	594
GnigEST003253	2960	DANRE	WD repeat-containing protein mio	291526	0	59	678.322	883	529
GnigEST003314	2615	DROME	Transcription initiation factor TFIID subunit 1	207951	0	62	654.825	732	458
GnigEST003359	2077	HUMAN	BTB/POZ domain-containing protein 2	74091	0	80	672.929	466	377
GnigEST003361	3985	HUMAN	Neuron navigator 2	376456	0	62	700.664	841	527
GnigEST003469	3134	PONAB	U2-associated protein SR140	305034	0	59	608.601	746	442
GnigEST003487	2386	DROME	Voltage-dependent calcium channel type D subunit alpha-1	182282	0	84	1070.46	700	590
GnigEST003494	2982	HUMAN	Leucine-rich repeat-containing protein 16A	304904	0	60	428.328	622	379
GnigEST003502	3373	HUMAN	Brefeldin A-inhibited guanine nucleotide-exchange protein 2	297192	0	80	722.62	548	441
GnigEST003506	2625	SCHAM	Fasciclin-2	95242	0	61	649.047	750	459
GnigEST003551	2957	MOUSE	Non-lysosomal glucosylceramidase	300209	0	59	683.33	836	501
GnigEST003569	4619	HUMAN	Protein TANC2	379343	0	60	874.004	1102	663
GnigEST003587	1869	AEDAE	Probable citrate synthase 1, mitochondrial	318302	0	93	762.681	421	395
GnigEST003603	3369	DROME	Dual 3',5'-cyclic-AMP and -GMP phosphodiesterase 11	378273	0	86	1048.11	672	584
GnigEST003630	2355	DROME	Tyrosine 3-monooxygenase	150927	0	75	541.962	438	332
GnigEST003639	2289	DROME	Putative fatty acyl-CoA reductase CG5065	245519	0	79	699.893	515	411
GnigEST003648	4181	MOUSE	Pecanex-like protein 1	256940	0	76	1369.37	1092	830
GnigEST003702	1709	ONCMY	Tubulin alpha chain, testis-specific	158760	0	96	869.766	448	431
GnigEST003740	2393	DROME	Probable glutaminyl-tRNA synthetase	126938	0	84	640.958	422	356
GnigEST003748	1589	DROME	26S protease regulatory subunit 4	125136	0	92	771.926	439	404
GnigEST003757	1845	DROME	Cytochrome P450 4g15	108039	0	72	655.981	557	406
GnigEST003805	3119	HUMAN	Tripartite motif-containing protein 71	269583	0	65	649.432	674	441
GnigEST003832	2109	HUMAN	Serine/threonine-protein phosphatase 5	68149	0	84	707.597	471	397
GnigEST003835	2919	HUMAN	Canalicular multispecific organic anion transporter 1	290154	0	71	660.988	589	422
GnigEST003850	3255	CHICK	UPF0636 protein C4orf41 homolog	304632	0	57	682.945	1049	601
GnigEST003854	2160	HUMAN	BTB/POZ domain-containing protein 9	50556	0	75	669.848	544	413
GnigEST003860	2334	BOMMO	Glycyl-tRNA synthetase	188632	0	79	802.357	588	468
GnigEST003862	2803	HUMAN	Rap guanine nucleotide exchange factor 4	151312	0	66	811.601	861	574
GnigEST003897	2352	MOUSE	Transmembrane 9 superfamily member 4	103891	0	73	749.969	626	457
GnigEST003912	1657	HUMAN	Alpha-aminoadipic semialdehyde dehydrogenase	403942	0	80	692.96	498	402
GnigEST003916	2148	DROME	Stress-activated protein kinase JNK	243939	0	92	645.195	363	335
GnigEST003919	2444	DANRE	Lon protease homolog 2, peroxisomal	305344	0	66	681.019	777	517
GnigEST003924	2861	BOVIN	WD repeat-containing protein 44	244674	0	69	678.322	629	437
GnigEST003936	5018	DROME	Down syndrome cell adhesion molecule-like protein CG42256	424142	0	55	666.381	1013	567
GnigEST003939	15344	DROME	Titin	379694	0	80	6754.08	4790	3871
GnigEST003941	5074	DROME	UDP-glucose:glycoprotein glucosyltransferase	140102	0	67	1421.37	1493	1002
GnigEST003946	6509	DROME	Protein crumbs	66563	0	58	1718.36	1922	1123
GnigEST003947	4271	CALVI	Xanthine dehydrogenase	162207	0	70	1532.31	1360	960
GnigEST003995	1916	DROME	C-terminal-binding protein	221962	0	83	649.432	413	344
GnigEST004030	4327	DROME	Cell division cycle 2-like protein kinase CG7597	240706	0	85	641.728	411	351
GnigEST004049	4006	MOUSE	ATP-dependent RNA helicase DHX8	251746	0	83	1446.03	953	798
GnigEST004079	4857	MOUSE	Nuclear pore complex protein Nup155	135838	0	58	923.694	1372	798
GnigEST004119	2301	DROME	G protein-coupled receptor kinase 1	306335	0	90	1010.75	584	528
GnigEST004120	3457	MOUSE	Heat shock 70 kDa protein 4	165703	0	66	730.324	778	515
GnigEST004130	3163	HUMAN	Bifunctional 3'-phosphoadenosine 5'-phosphosulfate synthase 2	149378	0	82	847.425	593	488
GnigEST004161	2036	XENTR	Arginyl-tRNA synthetase, cytoplasmic	301191	0	72	718.383	643	463
GnigEST004195	2545	DANRE	Cleft lip and palate transmembrane protein 1 homolog	255857	0	73	655.981	575	421
GnigEST004206	1701	AEDAE	Myosin-VIIa	318328	0	85	902.508	569	488
GnigEST004266	1711	DROME	Tyrosine-protein kinase Btk29A	147624	0	90	535.028	300	271
GnigEST004278	5283	HUMAN	Multidrug resistance-associated protein 1	354082	0	67	1468.75	1543	1036
GnigEST004281	4280	RHOPR	Nitric oxide synthase, salivary gland	98783	0	80	1566.21	1114	897
GnigEST004283	4243	DROME	Sterile alpha and TIR motif-containing protein 1	210542	0	72	1102.81	986	715
GnigEST004310	2446	DROME	Phenoloxidase subunit A3	159690	0	77	710.294	520	405
GnigEST004325	2101	MOUSE	DNA repair and recombination protein RAD54-like	217218	0	80	923.309	676	541
GnigEST004336	1836	DROME	Exocyst complex component 1	95219	0	72	464.537	428	310
GnigEST004340	13392	HUMAN	Baculoviral IAP repeat-containing protein 6	440663	0	65	756.518	812	532
GnigEST004372	3389	MOUSE	Symplekin	85485	0	60	700.664	923	557
GnigEST004412	6388	XENTR	HEAT repeat-containing protein 5B	343062	0	76	895.575	775	594
GnigEST004417	1891	CRIGR	UTP--glucose-1-phosphate uridylyltransferase	98689	0	79	647.892	494	392
GnigEST004431	2312	HUMAN	Valyl-tRNA synthetase	65278	0	62	712.22	790	496
GnigEST004439	3711	BOVIN	Carnitine O-palmitoyltransferase 1, muscle isoform	261763	0	69	828.55	771	536
GnigEST004444	2714	DROPS	Eukaryotic translation initiation factor 3 subunit C	21384	0	74	1053.51	878	651
GnigEST004471	1932	CHICK	Glycine dehydrogenase [decarboxylating], mitochondrial	96312	0	79	772.696	564	449
GnigEST004474	2901	DROME	cGMP-dependent protein kinase, isozyme 2 forms cD5/T2	137885	0	85	941.414	606	520
GnigEST004510	6928	HUMAN	Filamin-B	316147	0	61	1655.57	1981	1213
GnigEST004522	2121	DROME	Protein TRC8 homolog	207958	0	66	685.641	674	449
GnigEST004528	3532	DROME	Unc-112-related protein	140119	0	77	880.167	720	557
GnigEST004602	1900	DROME	G protein-coupled receptor kinase 2	247634	0	86	741.495	458	394
GnigEST004618	4259	DROME	Calcium-transporting ATPase sarcoplasmic/endoplasmic reticulum type	164749	0	92	1749.95	1018	942
GnigEST004640	3579	MOUSE	Cullin-1	162783	0	86	851.277	572	497
GnigEST004718	1804	DROME	Probable peroxisomal acyl-coenzyme A oxidase 1	246768	0	77	534.643	423	326
GnigEST004720	2953	MOUSE	Threonyl-tRNA synthetase, cytoplasmic	115822	0	83	1027.31	690	574
GnigEST004748	6435	CAEEL	Collagen alpha-1(IV) chain	206342	0	40	829.321	1851	747
GnigEST004749	3312	HUMAN	Transmembrane 9 superfamily member 2	80058	0	79	914.45	642	508
GnigEST004768	4095	MOUSE	Multiple epidermal growth factor-like domains protein 8	405751	0	48	738.413	1198	583
GnigEST004779	3312	DROME	Integrin beta-PS	245451	0	68	971.459	840	578
GnigEST004781	2594	DROME	Mitochondrial Rho GTPase	246742	0	73	719.153	633	468
GnigEST004803	2145	MOUSE	BTB/POZ domain-containing protein 3	183348	0	84	645.966	424	360
GnigEST004812	3723	HUMAN	Importin subunit beta-1	77292	0	83	1212.59	874	726
GnigEST004828	2746	DROPS	Protein MON2 homolog	427480	0	72	943.34	866	627
GnigEST004829	4011	DROME	Dosage compensation regulator	93884	0	74	1081.24	949	703
GnigEST004832	2185	RAT	Syntaxin-binding protein 5	57143	0	73	813.142	718	527
GnigEST004833	5638	DROME	Laminin subunit gamma-1	133554	0	63	1407.51	1360	862
GnigEST004854	2874	DROME	Acetyl-coenzyme A synthetase	151786	0	84	1068.14	670	566
GnigEST004866	3203	HUMAN	Probable ATP-dependent RNA helicase DDX46	295222	0	74	748.043	629	466
GnigEST004890	2638	PONAB	Delta-1-pyrroline-5-carboxylate synthase	222936	0	71	769.615	734	524
GnigEST004891	1661	BOVIN	Polyubiquitin-C	268175	0	100	936.021	483	483
GnigEST004895	4817	MOUSE	Vigilin	65303	0	69	1242.25	1244	869
GnigEST004913	7772	XENTR	CCR4-NOT transcription complex subunit 1	334253	0	68	2532.67	2450	1689
GnigEST004924	7356	CHICK	Fatty acid synthase	56367	0	64	1050.43	1149	745
GnigEST004928	3060	DROME	DNA replication licensing factor Mcm2	99817	0	82	1080.09	767	630
GnigEST004937	1948	BOVIN	T-complex protein 1 subunit zeta	267567	0	83	705.671	531	442
GnigEST004940	2486	MOUSE	Glutamate--cysteine ligase catalytic subunit	150216	0	76	810.446	626	482
GnigEST004943	9607	CHICK	Talin-1	127494	0	67	2386.3	2559	1724
GnigEST004944	3099	MOUSE	Exosome complex exonuclease RRP44	359417	0	72	1065.83	954	693
GnigEST004951	4225	DROME	Epidermal growth factor receptor	278528	0	71	1540.01	1318	941
GnigEST004956	2826	MANSE	V-type proton ATPase subunit C	150210	0	88	644.04	386	342
GnigEST004960	3172	MOUSE	Probable cation-transporting ATPase 13A2	127310	0	57	395.586	578	333
GnigEST004967	3755	DANRE	Hypoxia up-regulated protein 1	243700	0	63	775.393	914	580
GnigEST004977	2777	MOUSE	H(+)/Cl(-) exchange transporter 3	156058	0	68	829.706	778	534
GnigEST004978	2669	HUMAN	Oxysterol-binding protein 2	126238	0	64	741.495	796	513
GnigEST004980	13901	MOUSE	E3 ubiquitin-protein ligase HUWE1	229572	0	91	726.857	421	384
GnigEST004986	5052	AEDAE	Myosin-VIIa	318328	0	63	589.726	721	458
GnigEST004997	2674	PONAB	Putative pre-mRNA-splicing factor ATP-dependent RNA helicase DHX15	305388	0	89	1151.73	697	622
GnigEST005009	4556	DROME	Putative ATP-dependent RNA helicase me31b	71159	0	90	709.523	430	387
GnigEST005011	3170	BOMMO	Chromodomain-helicase-DNA-binding protein 1	386701	0	77	1023.46	753	587
GnigEST005015	2449	DANRE	Dihydropyrimidine dehydrogenase [NADP+]	252645	0	72	867.84	712	515
GnigEST005030	2813	DROME	Probable 2-oxoglutarate dehydrogenase E1 component DHKTD1 homolog, mitochondrial	240726	0	68	886.715	834	568
GnigEST005039	2387	DROME	Phenoloxidase subunit A3	159690	0	75	672.544	547	415
GnigEST005043	3414	DROME	Probable Ras GTPase-activating protein	382050	0	64	654.825	664	430
GnigEST005044	3990	HUMAN	Probable E3 ubiquitin-protein ligase MYCBP2	221985	0	67	768.844	658	447
GnigEST005048	2216	XENLA	Small G protein signaling modulator 3 homolog	366667	0	83	1020.76	710	590
GnigEST005051	8871	DROME	Ryanodine receptor 44F	54659	0	82	4398.96	2965	2445
GnigEST005056	3452	DROME	Probable elongator complex protein 3	243738	0	94	932.169	515	489
GnigEST005070	3017	DROME	Bifunctional heparan sulfate N-deacetylase/N-sulfotransferase	127459	0	79	1040.41	748	592
GnigEST005094	1837	DROME	Histone deacetylase Rpd3	153270	0	81	774.237	495	404
GnigEST005115	1851	MOUSE	Alpha-aminoadipic semialdehyde synthase, mitochondrial	153315	0	69	534.258	527	368
GnigEST005117	2553	HOMAM	Guanine nucleotide-binding protein G(s) subunit alpha	146695	0	91	668.307	377	344
GnigEST005130	1931	DROME	N-acetylgalactosaminyltransferase 7	153568	0	80	848.581	582	468
GnigEST005138	3899	MANSE	Bumetanide-sensitive sodium-(potassium)-chloride cotransporter	187793	0	62	860.136	1019	632
GnigEST005147	1379	BOVIN	Mitogen-activated protein kinase 1	150900	0	91	636.721	356	326
GnigEST005151	2289	HUMAN	ATP-binding cassette sub-family D member 3	157966	0	76	798.119	665	506
GnigEST005194	2025	MOUSE	Armadillo repeat-containing protein 8	292896	0	73	708.753	651	480
GnigEST005204	3349	DROME	Probable Rho GTPase-activating protein CG5521	248217	0	56	634.795	960	546
GnigEST005249	1993	DROME	ATP-dependent RNA helicase SUV3 homolog, mitochondrial	424147	0	84	975.311	657	558
GnigEST005267	2390	DROME	Protocadherin-like wing polarity protein stan	288128	0	77	779.63	603	466
GnigEST005351	2332	ANAPL	NADP-dependent malic enzyme	127355	0	78	719.153	551	430
GnigEST005355	1816	ANOGA	Adenosylhomocysteinase	21552	0	92	735.332	430	396
GnigEST005356	2319	ID	ATP-binding cassette sub-family E member 1	177671	0	91	972.615	578	529
GnigEST005359	1746	MANSE	Tubulin beta-1 chain	86590	0	93	797.349	436	407
GnigEST005361	5781	DROME	Clathrin heavy chain	78204	0	89	2806.55	1674	1504
GnigEST005362	2069	DROME	Putative inorganic phosphate cotransporter	49723	0	76	660.988	507	387
GnigEST005366	8635	MOUSE	E3 ubiquitin-protein ligase HECTD1	440200	0	76	1118.61	872	671
GnigEST005369	3272	DROME	Sodium- and chloride-dependent GABA transporter ine	244436	0	62	645.58	710	443
GnigEST005372	3113	DROME	Putative glycogen [starch] synthase	207944	0	83	1045.8	674	566
GnigEST005373	14599	CHICK	Low-density lipoprotein receptor-related protein 1	63897	0	57	2997.22	3778	2172
GnigEST005374	3213	DROME	26S proteasome non-ATPase regulatory subunit 1	136605	0	83	1224.15	851	711
GnigEST005377	4146	HUMAN	Eukaryotic translation initiation factor 5B	297709	0	84	884.019	624	526
GnigEST005379	2045	DROME	Protein ROP	71393	0	83	865.529	595	499
GnigEST005383	3441	HUMAN	Golgi-specific brefeldin A-resistance guanine nucleotide exchange factor 1	174524	0	64	1070.07	1199	773
GnigEST005405	2862	MOUSE	Vacuolar protein sorting-associated protein 35	62134	0	83	1127.08	798	668
GnigEST005452	1951	HUMAN	Ubiquitin-protein ligase E3A	295450	0	75	660.218	561	424
GnigEST005490	2211	XENLA	SUMO-activating enzyme subunit 2-A	304017	0	68	637.876	644	441
GnigEST005491	2373	HUMAN	Kinesin-like protein KIF16B	205516	0	65	655.596	752	490
GnigEST005497	1706	DROME	Negative elongation factor D	155350	0	83	789.26	538	451
GnigEST005641	7211	SCHPO	Putative glutamate synthase [NADPH]	76082	0	65	2083.15	2109	1381
GnigEST005643	3373	DROME	Protein hu-li tai shao	145293	0	70	748.043	679	481
GnigEST005656	3344	DROME	Vinculin	96849	0	75	910.598	766	579
GnigEST005657	3446	DROME	ATP-dependent RNA helicase bel	240422	0	83	696.427	491	411
GnigEST005664	8153	HUMAN	Translational activator GCN1	439668	0	65	2370.89	2684	1753
GnigEST005686	3273	HUMAN	WASH complex subunit strumpellin	245692	0	72	1147.5	1061	770
GnigEST005689	2702	MOUSE	Vacuolar protein sorting-associated protein 11 homolog	170276	0	65	662.144	713	464
GnigEST005702	3206	HUMAN	Uncharacterized protein KIAA0564	241370	0	65	960.288	1066	700
GnigEST005709	2305	DROME	Protein crooked neck	113786	0	79	651.744	467	370
GnigEST005719	3418	DROME	DNA-directed RNA polymerase III subunit RPC2	86078	0	80	928.702	645	522
GnigEST005729	3064	CHICK	116 kDa U5 small nuclear ribonucleoprotein component	305822	0	82	1062.37	727	597
GnigEST005743	3150	SCHAM	Annulin	143318	0	83	715.687	492	410
GnigEST005812	7838	DROME	Spectrin beta chain	79537	0	81	3268.79	2309	1882
GnigEST005813	12607	HUMAN	Spectrin beta chain, brain 4	73856	0	52	1321.22	2675	1401
GnigEST005816	5864	HUMAN	Plectin	251754	0	53	711.064	1334	717
GnigEST005818	16158	HUMAN	E3 ubiquitin-protein ligase UBR4	290818	0	69	2365.88	2327	1616
GnigEST005819	4242	MOUSE	Ubiquitin conjugation factor E4 B	285357	0	62	890.182	1064	670
GnigEST005828	4374	MOUSE	Serine/threonine-protein kinase MARK2	351768	0	63	743.806	816	521
GnigEST005835	4048	MOUSE	Probable phospholipid-transporting ATPase IA	101712	0	72	1259.2	1121	812
GnigEST005836	4165	RAT	Tuberin	244796	0	55	760.755	1207	669
GnigEST005840	1890	TAEGU	Eukaryotic initiation factor 4A-III	411721	0	95	713.375	399	382
GnigEST005850	3296	CHICK	Exportin-7	229635	0	85	1104.74	748	636
GnigEST005864	3472	MOUSE	Protein kinase C iota type	355733	0	75	671.774	502	381
GnigEST005957	2233	HUMAN	ATP-binding cassette sub-family F member 2	4425	0	83	862.062	593	493
GnigEST005958	1714	DROME	Glutamate dehydrogenase, mitochondrial	117897	0	88	864.374	547	482
GnigEST005961	3539	HUMAN	E3 ubiquitin-protein ligase MARCH6	300009	0	66	677.937	652	432
GnigEST005964	3215	MOUSE	Neutral alpha-glucosidase AB	133986	0	65	946.806	931	613
GnigEST005968	3845	CHICK	DNA damage-binding protein 1	47851	0	82	1363.59	985	812
GnigEST005972	7569	MOUSE	Pre-mRNA-processing-splicing factor 8	226268	0	94	4354.28	2314	2180
GnigEST005975	2386	DROME	Phosphoglucomutase	48443	0	77	710.679	562	434
GnigEST005989	3714	DROPS	Protein dopey-1 homolog	21406	0	56	799.275	1242	704
GnigEST006132	2314	ANAPL	NADP-dependent malic enzyme	127355	0	77	714.146	557	432
GnigEST006134	2450	BOMMO	Eukaryotic translation initiation factor 3 subunit B	315296	0	76	887.871	684	521
GnigEST006147	3303	DROME	Alpha-actinin, sarcomeric	158933	0	93	1206.43	664	623
GnigEST006163	3335	MOUSE	Puromycin-sensitive aminopeptidase	241152	0	68	919.457	888	605
GnigEST006164	2590	HUMAN	Puromycin-sensitive aminopeptidase	217862	0	69	811.601	755	522
GnigEST006175	6783	XENLA	Lysine-specific demethylase 3A-A	302046	0	56	660.218	871	495
GnigEST006181	2205	DROME	V-type proton ATPase subunit H	181162	0	85	686.797	466	399
GnigEST006184	1732	ID	Vacuolar protein sorting-associated protein 4A	96980	0	84	653.67	433	364
GnigEST006192	5196	AEDAE	Myosin-VIIa	318328	0	60	1392.1	1871	1124
GnigEST006194	2687	DROME	Furin-like protease 1, isoform 1-CRR	173224	0	64	812.372	757	491
GnigEST006202	2805	MOUSE	ATP-binding cassette sub-family D member 1	96765	0	73	637.876	562	414
GnigEST006221	4768	HUMAN	Kinesin-like protein KIF21B	152976	0	59	1149.81	1616	954
GnigEST006222	2813	DROME	TBC1 domain family member CG11727	261805	0	73	833.943	734	543
GnigEST006235	3046	BOVIN	Cleavage and polyadenylation specificity factor subunit 1	91578	0	66	979.548	1038	691
GnigEST006238	2319	SCHAM	Fasciclin-1	50081	0	76	783.867	642	494
GnigEST006246	1474	DROME	Protein henna	55765	0	82	647.892	445	367
GnigEST006252	7198	DROME	Laminin subunit beta-1	246719	0	64	1764.97	1756	1132
GnigEST006254	2264	CULQU	Elongation factor G, mitochondrial	391013	0	86	1098.96	724	623
GnigEST006266	2645	DROME	F-box/WD repeat-containing protein 7	58632	0	87	793.497	485	422
GnigEST006268	2141	RAT	Muskelin	49536	0	70	716.842	646	455
GnigEST006402	1708	XENLA	Tubulin beta-4 chain	171033	0	93	673.7	362	338
GnigEST006403	3310	RAT	Long-chain-fatty-acid--CoA ligase 3	86427	0	65	634.795	692	456
GnigEST006405	2568	BOVIN	Heat shock protein HSP 90-alpha	199657	0	85	695.656	444	379
GnigEST006408	1700	DROME	Glutamate dehydrogenase, mitochondrial	117897	0	89	886.715	547	487
GnigEST006409	2047	DROME	V-type proton ATPase subunit B	56221	0	98	953.355	490	485
GnigEST006411	7950	DROME	Spectrin alpha chain	152241	0	89	3980.25	2415	2173
GnigEST006416	2534	DROME	Calpain-A	106564	0	72	919.842	772	558
GnigEST006418	3892	MOUSE	UDP-N-acetylglucosamine--peptide N-acetylglucosaminyltransferase 110 kDa subunit	300228	0	87	1661.74	1032	902
GnigEST006420	2150	DROME	Putative inorganic phosphate cotransporter	49723	0	77	647.892	480	373
GnigEST006421	2077	BOVIN	T-complex protein 1 subunit beta	308046	0	83	751.895	532	445
GnigEST006423	6635	DROME	Protein crumbs	66563	0	58	1718.36	1922	1123
GnigEST006425	5739	HUMAN	Ankyrin-2	419518	0	74	1640.17	1407	1044
GnigEST006427	2018	DANRE	Fumarate hydratase, mitochondrial	198837	0	81	680.633	471	384
GnigEST006431	4171	DROME	Epidermal growth factor receptor	278528	0	71	1552.73	1323	947
GnigEST006434	6117	HUMAN	Cytoskeleton-associated protein 5	305549	0	53	819.691	1511	801
GnigEST006437	4708	DROME	Inositol hexakisphosphate and diphosphoinositol-pentakisphosphate kinase	424128	0	87	1361.28	839	736
GnigEST006438	2210	MACFA	Pantothenate kinase 4	327853	0	66	700.279	684	458
GnigEST006439	5508	DROME	Bifunctional aminoacyl-tRNA synthetase	178811	0	69	1822.75	1633	1133
GnigEST006464	4462	RAT	Insulin receptor	150674	0	46	362.073	987	461
GnigEST006465	2752	DANRE	Ribonucleoside-diphosphate reductase large subunit	182579	0	84	1242.25	806	679
GnigEST006485	3585	CHICK	Ribosomal protein S6 kinase alpha-5	303649	0	75	836.254	698	530
GnigEST006495	3035	HUMAN	N-acetyltransferase 10	440672	0	69	564.688	544	376
GnigEST006525	2438	PONAB	Polyribonucleotide nucleotidyltransferase 1, mitochondrial	239366	0	74	865.914	716	533
GnigEST006628	2349	HUMAN	EH domain-containing protein 3	295126	0	78	763.451	568	444
GnigEST006635	2112	DROME	Protein Malvolio	163899	0	76	634.41	535	407
GnigEST006644	3379	HUMAN	Ral GTPase-activating protein subunit beta	279257	0	56	651.744	1001	569
GnigEST006645	3794	BOVIN	Structural maintenance of chromosomes protein 1A	54536	0	70	1079.7	1110	779
GnigEST006648	2682	BOVIN	DNA replication licensing factor MCM7	266398	0	75	761.14	640	486
GnigEST006652	3857	BOMMO	Alanyl-tRNA synthetase, cytoplasmic	75066	0	80	1324.69	967	783
GnigEST006654	14256	HUMAN	Low-density lipoprotein receptor-related protein 2	353654	0	56	3458.31	4616	2594
GnigEST006657	3446	SARPE	Poly [ADP-ribose] polymerase	105781	0	60	831.247	1065	648
GnigEST006660	3895	MOUSE	Probable cation-transporting ATPase 13A3	256943	0	61	868.996	1115	682
GnigEST006665	4418	AEDAE	Insulin-like receptor	413487	0	50	685.641	1345	675
GnigEST006667	2147	BOVIN	Cleavage and polyadenylation specificity factor subunit 3	148041	0	83	978.778	672	561
GnigEST006670	2897	RAT	Sarcosine dehydrogenase, mitochondrial	52886	0	70	923.694	871	611
GnigEST006673	1651	ID	Tubulin beta-2C chain	73300	0	95	810.061	426	405
GnigEST006681	3327	MOUSE	Probable E3 ubiquitin-protein ligase HERC4	353989	0	61	881.708	1072	661
GnigEST006694	2684	HUMAN	SLIT-ROBO Rho GTPase-activating protein 1	195361	0	62	643.654	811	508
GnigEST006860	2988	DROME	Eukaryotic peptide chain release factor subunit 1	57401	0	97	809.675	430	418
GnigEST006968	2717	PONAB	Putative pre-mRNA-splicing factor ATP-dependent RNA helicase DHX15	305388	0	90	803.897	481	436
GnigEST007108	2314	DROME	Mannosyl-oligosaccharide alpha-1,2-mannosidase isoform A	90138	0	68	729.554	676	460
GnigEST007222	9284	MOUSE	Vacuolar protein sorting-associated protein 13C	273036	0	50	1031.94	2415	1208
GnigEST007504	3058	ANOGA	AP-2 complex subunit alpha	353966	0	89	1517.29	940	838
GnigEST007620	2905	MOUSE	Cullin-1	162783	0	85	1168.68	772	657
GnigEST007683	2727	DROME	Probable chitinase 3	14868	0	65	832.787	817	533
GnigEST007694	2554	XENLA	Presequence protease, mitochondrial	300225	0	61	664.84	827	508
GnigEST007846	2170	DROME	Protein fat-free homolog	244661	0	70	717.998	742	520
GnigEST007853	2313	MOUSE	BTB/POZ domain-containing protein KCTD3	289330	0	74	796.579	664	494
GnigEST007865	2439	ANAPL	NADP-dependent malic enzyme	127355	0	75	686.797	563	427
GnigEST007869	3136	MOUSE	Coatomer subunit beta'	65309	0	86	1347.41	843	733
GnigEST007870	6664	DROME	Chromodomain-helicase-DNA-binding protein Mi-2 homolog	60969	0	75	1650.57	1267	951
GnigEST007873	3870	HUMAN	Leucyl-tRNA synthetase, cytoplasmic	87924	0	72	796.964	697	504
GnigEST007893	4225	HUMAN	Protein TANC2	379343	0	60	863.988	1076	655
GnigEST007896	1657	ANOGA	Mediator of RNA polymerase II transcription subunit 17	21527	0	73	660.218	558	408
GnigEST007898	2895	HUMAN	DNA-directed RNA polymerase III subunit RPC2	187786	0	79	1309.28	951	758
GnigEST007906	2062	HUMAN	DNA excision repair protein ERCC-6	123135	0	73	785.793	686	501
GnigEST007916	3219	HUMAN	F-box only protein 11	351645	0	80	1159.44	794	640
GnigEST007973	3395	HUMAN	TBC1 domain family member 9	346564	0	63	535.413	610	389
GnigEST007975	4486	HUMAN	Ubiquitin carboxyl-terminal hydrolase 34	321193	0	69	1498.41	1370	954
GnigEST007998	1599	MOUSE	E3 ubiquitin-protein ligase HECW2	211367	0	81	685.256	464	377
GnigEST008055	2199	DROME	Probable phosphorylase b kinase regulatory subunit alpha	195537	0	75	800.045	675	508
GnigEST008086	5685	HUMAN	TATA-binding protein-associated factor 172	65821	0	56	1166.37	1636	924
GnigEST008152	5147	AEDAE	Myosin-VIIa	318328	0	64	741.88	893	572
GnigEST008184	2115	DROME	Thioredoxin reductase 1, mitochondrial	246634	0	80	662.529	489	395
GnigEST008185	4156	DROME	Brain tumor protein	77127	0	66	702.975	721	481
GnigEST008253	3315	HUMAN	DNA-directed RNA polymerase III subunit RPC2	187786	0	82	1585.47	1091	903
GnigEST008321	3288	HUMAN	Lysine-specific demethylase 6A	305542	0	72	658.292	534	389
GnigEST008336	3427	HUMAN	Nipped-B-like protein	210681	0	61	743.421	996	608
GnigEST008339	2061	STRPU	Kinesin-II 85 kDa subunit	140097	0	71	692.189	638	457
GnigEST008354	4309	DROME	Neurexin-4	122954	0	76	1660.58	1268	970
GnigEST008362	4218	HUMAN	Protein polybromo-1	279697	0	60	664.07	885	532
GnigEST008365	2411	MOUSE	Probable ATP-dependent RNA helicase DHX34	210409	0	61	698.353	816	504
GnigEST008366	4045	DROME	Dynactin subunit 1	190068	0	54	659.448	1193	650
GnigEST008372	3360	RAT	Echinoderm microtubule-associated protein-like 2	300991	0	75	795.038	646	489
GnigEST008375	1877	LOCMI	Guanine nucleotide-binding protein G(o) subunit alpha	190760	0	94	657.907	354	333
GnigEST008377	3830	HUMAN	Eukaryotic peptide chain release factor GTP-binding subunit ERF3A	146927	0	85	663.3	427	367
GnigEST008392	3485	HUMAN	E3 ubiquitin-protein ligase UHRF1	143974	0	66	627.091	596	399
GnigEST008397	2985	RAT	AMP deaminase 2	282600	0	74	866.685	718	533
GnigEST008419	3089	AEDAE	Myosin-VIIa	318328	0	92	1746.48	980	909
GnigEST008437	2822	HUMAN	Reversion-inducing cysteine-rich protein with Kazal motifs	121131	0	57	473.781	556	322
GnigEST008438	2994	HUMAN	Ubiquitin-protein ligase E3C	8074	0	68	682.559	711	488
GnigEST008443	2846	HUMAN	Multidrug resistance protein 3	4484	0	63	756.518	893	564
GnigEST008446	3010	DROME	Disks large 1 tumor suppressor protein	207962	0	72	964.911	811	588
GnigEST008452	3437	ANOGA	Probable methylmalonate-semialdehyde dehydrogenase [acylating], mitochondrial	21549	0	85	766.533	499	427
GnigEST008465	5257	XENLA	Insulin receptor	56704	0	57	1009.21	1396	797
GnigEST008466	2773	DROME	Aryl hydrocarbon receptor nuclear translocator homolog	277090	0	91	431.024	255	233
GnigEST008467	3231	DROME	Neurobeachin	287911	0	92	991.49	571	527
GnigEST008473	2998	DROME	Armadillo segment polarity protein	99458	0	93	1142.87	679	633
GnigEST008478	4194	HUMAN	Myosin-IXa	373775	0	59	889.026	1171	699
GnigEST008481	2461	HUMAN	Myotubularin-related protein 13	137987	0	62	630.172	727	455
GnigEST008482	3500	RAT	Histone deacetylase 4	356183	0	59	692.96	924	553
GnigEST008483	3973	HUMAN	Exportin-5	242021	0	55	760.37	1248	690
GnigEST008500	3524	CHICK	Neogenin	80402	0	52	674.855	1164	607
GnigEST008502	3127	MOUSE	DNA polymerase zeta catalytic subunit	137086	0	72	930.628	881	635
GnigEST008509	3026	HUMAN	Spermatogenesis-associated protein 20	440621	0	60	674.855	774	472
GnigEST008510	4018	DROME	Chromatin-remodeling complex ATPase chain Iswi	246092	0	85	1496.87	978	835
GnigEST008511	2708	MOUSE	Histone-lysine N-methyltransferase, H3 lysine-9 specific 3	158471	0	72	536.184	457	332
GnigEST008518	2338	DROME	Protein stoned-B	199215	0	85	535.413	338	289
GnigEST008522	3421	HUMAN	Lysine-specific histone demethylase 1A	217197	0	82	520.776	333	275
GnigEST008526	3135	MOUSE	Dedicator of cytokinesis protein 9	196398	0	62	780.4	987	614
GnigEST008528	3751	MANSE	Bumetanide-sensitive sodium-(potassium)-chloride cotransporter	187793	0	62	863.988	1017	633
GnigEST008529	6796	HUMAN	Lysosomal-trafficking regulator	139103	0	51	854.744	1497	771
GnigEST008531	2182	DROME	Protein still life, isoform SIF type 1	112762	0	86	1166.37	750	645
GnigEST008564	3378	HUMAN	Golgi apparatus protein 1	346498	0	59	782.711	1054	630
GnigEST008566	4027	DROMO	Eukaryotic translation initiation factor 3 subunit A	409346	0	78	1020.76	788	615
GnigEST008574	4749	AEDAE	Probable ATP-dependent RNA helicase spindle-E	318192	0	57	568.54	925	531
GnigEST008580	1765	MOUSE	Probable ATP-dependent RNA helicase DDX17	231012	0	81	641.728	443	362
GnigEST008581	2240	MOUSE	Transketolase-like protein 2	289973	0	75	761.14	622	471
GnigEST008591	2201	HUMAN	Serine/threonine-protein phosphatase 2A 65 kDa regulatory subunit A alpha isoform	294881	0	89	933.324	585	525
GnigEST008592	4375	BOVIN	Pyruvate carboxylase, mitochondrial	323142	0	76	1485.32	1168	890
GnigEST008628	4636	HUMAN	THO complex subunit 2	353306	0	63	1120.53	1297	828
GnigEST008663	1703	LOCMI	Arrestin homolog	70307	0	93	679.863	401	373
GnigEST008690	1916	DROME	Protein Malvolio	163899	0	76	634.41	535	407
GnigEST008741	2875	DANRE	Coatomer subunit gamma-2	314505	0	76	1060.83	881	678
GnigEST008764	3078	XENTR	ATP-binding cassette sub-family B member 6, mitochondrial	330481	0	65	749.584	822	538
GnigEST008770	3768	HUMAN	Zinc finger SWIM domain-containing protein 5	168978	0	75	763.451	645	487
GnigEST008773	2482	XENLA	Exportin-4	264495	0	63	636.721	809	512
GnigEST008801	4806	AEDAE	Protein KIAA0664 homolog	318329	0	82	1810.42	1305	1071
GnigEST008803	1709	HUMAN	ER degradation-enhancing alpha-mannosidase-like 2	108757	0	78	645.195	469	369
GnigEST008809	4308	MOUSE	Serine/threonine-protein kinase tousled-like 1	199569	0	67	718.768	723	489
GnigEST008821	5159	DROME	Guanylate cyclase 32E	116973	0	57	709.523	1057	608
GnigEST008823	5295	MOUSE	Mitogen-activated protein kinase-binding protein 1	302003	0	73	814.298	708	519
GnigEST008832	8143	DROME	Helicase domino	243582	0	61	682.945	824	510
GnigEST008833	6027	DROME	E3 ubiquitin-protein ligase UBR1	160834	0	61	779.245	929	567
GnigEST008837	2830	DROME	Transmembrane and TPR repeat-containing protein CG4050	243312	0	67	849.351	804	540
GnigEST008838	4846	DROME	Tyrosine-protein kinase Abl	147597	0	53	968.378	1350	722
GnigEST008844	3911	DROME	Putative polypeptide N-acetylgalactosaminyltransferase 9	188723	0	83	778.859	503	419
GnigEST008846	2938	COLLI	NADP-dependent malic enzyme	181810	0	76	696.041	557	426
GnigEST008864	3739	HUMAN	Importin-5	189184	0	71	1193.72	1091	783
GnigEST008889	2530	DROME	Transcription initiation factor TFIID subunit 2	150325	0	80	774.622	568	458
GnigEST008899	4295	HUMAN	Homeodomain-interacting protein kinase 2	151326	0	50	699.508	1168	587
GnigEST008911	5100	CHICK	Multidrug resistance-associated protein 1	229288	0	62	864.374	1024	638
GnigEST008938	2567	DROME	Heat shock 70 kDa protein cognate 5	121687	0	89	980.704	618	552
GnigEST008943	3856	HUMAN	Splicing factor 3B subunit 1	289557	0	87	1882.46	1188	1035
GnigEST008971	2422	DANRE	Succinate dehydrogenase [ubiquinone] flavoprotein subunit, mitochondrial	314543	0	85	1021.92	648	554
GnigEST008978	2300	DROME	cAMP-dependent protein kinase catalytic subunit	8397	0	94	655.596	350	329
GnigEST008998	2085	DROME	Serine/threonine-protein phosphatase 2B catalytic subunit 2	104025	0	92	874.774	479	445
GnigEST009012	3051	HUMAN	Phosphatidylinositol-4,5-bisphosphate 3-kinase catalytic subunit delta isoform	202375	0	61	711.064	897	549
GnigEST009020	2275	DROME	Protein bicaudal D	45850	0	68	650.203	693	475
GnigEST009040	12985	HUMAN	Spectrin beta chain, brain 4	73856	0	52	1320.84	2672	1397
GnigEST009041	6219	DROME	Disco-interacting protein 2	103789	0	74	1980.68	1602	1198
GnigEST009047	6915	DROME	Protein sidekick	147054	0	78	2899	2181	1705
GnigEST009061	2313	DROME	Alpha-mannosidase 2	67877	0	64	538.88	609	394
GnigEST009068	2526	RAT	Synaptojanin-1	315384	0	74	518.079	433	322
GnigEST009074	2638	DROME	Nuclear protein localization protein 4 homolog	248342	0	68	678.322	614	421
GnigEST009105	4729	MOUSE	Coatomer subunit alpha	277064	0	84	1850.48	1230	1034
GnigEST009116	2483	ASPFU	Pre-mRNA-splicing factor syf1	26000	0	61	390.578	462	286
GnigEST009130	1875	HUMAN	AP-3 complex subunit delta-1	65550	0	78	661.759	541	425
GnigEST009135	2769	MACFA	Multidrug resistance-associated protein 1	194246	0	65	618.616	713	467
GnigEST009139	3136	HUMAN	Cartilage oligomeric matrix protein	251717	0	65	760.755	660	433
GnigEST009155	2795	DROME	DNA replication licensing factor MCM4	84611	0	84	1176	817	688
GnigEST009164	1865	DROME	ATP synthase subunit beta, mitochondrial	155318	0	94	821.231	459	434
GnigEST009171	2770	DROME	Transitional endoplasmic reticulum ATPase TER94	240904	0	90	1313.13	790	713
GnigEST009197	2870	ORENI	Exportin-2	296319	0	77	1161.75	936	726
GnigEST009222	2759	DROME	Calpain-A	106564	0	71	937.176	816	581
GnigEST009245	2665	DROME	Kinesin light chain	104701	0	76	689.108	521	401
GnigEST009260	3611	RAT	Serine/threonine-protein kinase TAO1	174964	0	69	949.888	906	631
GnigEST009266	2255	ANOGA	Mediator of RNA polymerase II transcription subunit 17	21527	0	76	818.92	651	501
GnigEST009272	1976	HUMAN	DNA replication licensing factor MCM8	78797	0	71	734.176	686	491
GnigEST009273	3121	XENTR	Nucleolar protein 6	226263	0	55	635.565	1044	578
GnigEST009276	3777	XENLA	Structural maintenance of chromosomes protein 2	153203	0	63	1014.99	1175	751
GnigEST009280	2027	DROME	Protein singed	52709	0	81	731.48	515	421
GnigEST009281	3012	CHICK	WD repeat-containing protein 59	304532	0	56	672.159	978	548
GnigEST009290	2316	MOUSE	Glycogen synthase kinase-3 beta	155170	0	89	639.032	381	341
GnigEST009291	10362	HUMAN	DmX-like protein 2	343144	0	52	1964.12	3447	1820
GnigEST009321	7569	CHICK	Acetyl-CoA carboxylase	71547	0	76	2927.89	2349	1804
GnigEST009325	1244	PONAB	Cleavage stimulation factor subunit 3	222123	0	86	634.41	414	359
GnigEST009344	6253	HUMAN	Cytoskeleton-associated protein 5	305549	0	52	819.305	1550	808
GnigEST009357	3191	HUMAN	Serologically defined colon cancer antigen 1	438463	0	71	748.043	679	487
GnigEST009364	1814	MOUSE	Methylcrotonoyl-CoA carboxylase beta chain, mitochondrial	234142	0	89	406.757	248	221
GnigEST009369	3021	HUMAN	DNA polymerase epsilon catalytic subunit A	262354	0	71	1073.15	1002	712
GnigEST009371	2496	DROME	DNA topoisomerase 3-beta	115740	0	79	596.275	435	346
GnigEST009374	5799	DANRE	Probable helicase with zinc finger domain	252440	0	70	1007.28	993	699
GnigEST009401	2605	BOVIN	Cell division cycle 5-like protein	284655	0	71	870.537	788	564
GnigEST009410	2334	DROME	Protocadherin-like wing polarity protein stan	288128	0	86	505.368	328	283
GnigEST009434	2937	DROME	Phosphoenolpyruvate carboxykinase [GTP]	158575	0	78	860.907	617	485
GnigEST009436	3145	CHICK	Coatomer subunit beta	303646	0	81	1315.06	960	784
GnigEST009442	1670	DROME	ATP-dependent RNA helicase WM6	98137	0	89	669.463	400	356
GnigEST009443	3977	MOUSE	UDP-N-acetylglucosamine--peptide N-acetylglucosaminyltransferase 110 kDa subunit	300228	0	93	1228.39	681	636
GnigEST009452	3773	MOUSE	Nodal modulator 1	293585	0	53	686.411	1242	663
GnigEST009453	2520	HUMAN	Methylcrotonoyl-CoA carboxylase subunit alpha, mitochondrial	141818	0	66	662.914	719	477
GnigEST009470	5152	BOMMO	DNA topoisomerase 2	87803	0	79	1690.63	1275	1014
GnigEST009474	2745	HUMAN	WD repeat-containing protein 3	183488	0	58	495.352	661	387
GnigEST009497	3540	HUMAN	Ankyrin repeat domain-containing protein 50	251764	0	70	909.442	859	605
GnigEST009514	4802	HUMAN	Supervillin	368154	0	54	705.671	1123	617
GnigEST009524	4423	CHICK	DNA-directed RNA polymerase III subunit RPC1	305658	0	81	1376.69	1006	821
GnigEST009529	2176	CHICK	116 kDa U5 small nuclear ribonucleoprotein component	305822	0	77	956.822	715	553
GnigEST009537	3891	MOUSE	Tubulin-specific chaperone D	77021	0	56	610.142	930	525
GnigEST009563	2436	DROME	Semaphorin-1A	208248	0	72	926.776	790	575
GnigEST009570	4715	HUMAN	Tetratricopeptide repeat protein 21B	331874	0	49	640.573	1346	669
GnigEST009577	3762	AEDAE	Mediator of RNA polymerase II transcription subunit 14	381296	0	71	1326.61	1211	869
GnigEST009579	3080	HUMAN	DNA mismatch repair protein Msh2	97734	0	67	843.958	933	626
GnigEST009600	3042	SCHAM	Annulin	143318	0	81	999.964	710	580
GnigEST009609	3340	MOUSE	Protein kinase C iota type	355733	0	77	755.362	543	423
GnigEST009616	2511	DROPS	Cytoplasmic FMR1-interacting protein	21431	0	83	1024.23	675	563
GnigEST009626	2862	DROME	Phosphoenolpyruvate carboxykinase [GTP]	158575	0	79	771.926	540	430
GnigEST009627	5821	HUMAN	Plectin	251754	0	53	711.064	1334	717
GnigEST009629	1864	HUMAN	EH domain-containing protein 3	295126	0	82	667.922	468	386
GnigEST009631	3231	DANRE	Solute carrier family 12 member 9	349603	0	62	735.717	930	579
GnigEST009632	3254	MANSE	Bumetanide-sensitive sodium-(potassium)-chloride cotransporter	187793	0	70	1138.64	1052	738
GnigEST009637	2639	DROME	Probable cleavage and polyadenylation specificity factor subunit 2	155594	0	76	831.247	699	536
GnigEST009646	2662	CHICK	ATP-dependent RNA helicase DDX42	305819	0	73	783.097	654	482
GnigEST009651	2379	MOUSE	Long-chain-fatty-acid--CoA ligase 1	101951	0	65	642.114	657	433
GnigEST009653	3602	DROME	DDB1- and CUL4-associated factor-like 1	244997	0	66	878.241	988	659
GnigEST009666	2037	DROME	T-complex protein 1 subunit alpha	102140	0	88	867.07	555	492
GnigEST009669	11493	CHICK	Chromodomain-helicase-DNA-binding protein 7	331199	0	61	1413.67	1659	1026
GnigEST009688	2801	MOUSE	Structural maintenance of chromosomes protein 3	122464	0	67	810.061	866	587
GnigEST009719	3106	CULQU	Moesin/ezrin/radixin homolog 1	391051	0	81	849.351	572	466
GnigEST009721	2429	MOUSE	Fizzy-related protein homolog	63179	0	74	666.766	526	394
GnigEST009733	2262	MOUSE	Heat shock protein 75 kDa, mitochondrial	176842	0	74	724.546	655	485
GnigEST009734	3521	HUMAN	Protein argonaute-2	241425	0	83	1285.78	854	709
GnigEST009737	4272	RAT	Serine/threonine-protein kinase MARK2	170624	0	64	728.398	769	498
GnigEST009745	2788	DROME	Kinesin-like protein Klp10A	119619	0	74	667.537	562	416
GnigEST009758	2053	CULQU	Kelch-like protein diablo	437554	0	95	1092.41	572	546
GnigEST009760	3627	CHICK	Exportin-7	229635	0	82	1550.03	1094	908
GnigEST009769	3091	MOUSE	Huntingtin-interacting protein 1	365792	0	58	642.114	975	571
GnigEST009817	11070	LOCMI	Apolipophorins	371701	0	54	917.916	1567	850
GnigEST009821	4748	DROME	Protein furry	248083	0	65	814.683	814	535
GnigEST009830	4250	DROME	Transient-receptor-potential-like protein	245622	0	68	1014.6	924	637
GnigEST009833	3437	HUMAN	Probable phospholipid-transporting ATPase IF	194431	0	56	754.592	1099	626
GnigEST009841	2852	DROME	Tyrosine-protein kinase Src64B	136297	0	87	799.66	498	438
GnigEST009847	3351	MOUSE	Oxysterol-binding protein-related protein 9	350331	0	62	700.664	773	483
GnigEST009854	3950	HUMAN	Probable histone-lysine N-methyltransferase ASH1L	305126	0	61	648.662	742	460
GnigEST009859	3068	MOUSE	Cryptochrome-1	160197	0	76	709.138	495	380
GnigEST009862	2526	DROME	Calcium-binding mitochondrial carrier protein Aralar1	183403	0	79	883.634	668	531
GnigEST009913	3306	DROME	C-1-tetrahydrofolate synthase, cytoplasmic	207941	0	79	1223.38	937	747
GnigEST009921	2829	RAT	Procollagen-lysine,2-oxoglutarate 5-dioxygenase 3	221737	0	65	696.041	705	464
GnigEST009931	2435	DROME	Atlastin	241125	0	79	664.84	498	398
GnigEST009933	3436	DROME	Protein shuttle craft	79527	0	65	860.136	743	487
GnigEST009934	3095	MOUSE	Importin-11	167557	0	63	833.558	967	617
GnigEST009937	4609	HUMAN	Multidrug resistance-associated protein 5	104880	0	60	1028.47	1379	832
GnigEST009983	2304	DROME	Probable phosphorylase b kinase regulatory subunit beta	50342	0	76	973.385	775	592
GnigEST009986	3567	RABIT	Very low-density lipoprotein receptor	87358	0	57	706.827	851	493
GnigEST009992	2408	DROME	Heat shock 70 kDa protein cognate 3	141418	0	86	1040.41	652	567
GnigEST009993	4075	DROME	Contactin	93588	0	68	1327.38	1234	845
GnigEST009997	4527	CRIGR	Golgi-specific brefeldin A-resistance guanine nucleotide exchange factor 1	52462	0	67	1017.68	1033	702
GnigEST010012	4362	RAT	Serine/threonine-protein kinase MARK2	170624	0	64	728.398	769	498
GnigEST010027	3034	DROME	Kinesin-like protein Klp10A	119619	0	74	667.537	562	416
GnigEST010060	1544	PANTR	NADH dehydrogenase [ubiquinone] flavoprotein 1, mitochondrial	324836	0	93	698.738	379	355
GnigEST010070	2060	XENLA	Cytosolic purine 5'-nucleotidase	302653	0	75	672.544	545	413
GnigEST010158	2880	CALJA	THO complex subunit 2	388221	0	66	738.413	762	505
GnigEST010190	5236	HUMAN	Multidrug resistance-associated protein 1	354082	0	66	1445.64	1543	1020
GnigEST010206	3183	HUMAN	AP-1 complex subunit beta-1	439196	0	81	1310.05	950	771
GnigEST010276	2658	CRIGR	Lysyl-tRNA synthetase	158552	0	84	785.408	504	427
GnigEST010277	1420	BOVIN	Notchless protein homolog 1	234456	0	79	637.106	468	371
GnigEST010289	14324	RAT	Low-density lipoprotein receptor-related protein 2	67314	0	54	3439.05	4872	2637
GnigEST010298	6521	DROME	Protein crumbs	66563	0	60	1216.45	1304	795
GnigEST010299	13863	MOUSE	E3 ubiquitin-protein ligase HUWE1	229572	0	57	1522.68	2194	1258
GnigEST010318	2798	HUMAN	General vesicular transport factor p115	346596	0	67	738.028	822	553
GnigEST010380	2026	DROME	tRNA (cytosine-5-)-methyltransferase CG6133	246411	0	69	646.351	602	416
GnigEST010390	11553	CHICK	Chromodomain-helicase-DNA-binding protein 7	331199	0	61	1409.82	1693	1040
GnigEST010415	6037	HUMAN	Cytoskeleton-associated protein 5	305549	0	53	832.787	1486	794
GnigEST010431	2254	ID	Protein transport protein Sec61 subunit alpha isoform 2	114313	0	96	884.404	476	460
GnigEST010451	4050	DROME	Protein retinal degeneration B	76280	0	70	1419.83	1248	882
GnigEST010463	3851	MOUSE	WD repeat and FYVE domain-containing protein 3	251302	0	68	1160.98	1166	797
GnigEST010466	4657	CHICK	Multidrug resistance-associated protein 1	229288	0	66	664.84	725	485
GnigEST010473	4077	HUMAN	Tolloid-like protein 1	148945	0	73	1073.54	876	641
GnigEST010483	2057	DROME	Alkyldihydroxyacetonephosphate synthase	164053	0	73	708.753	572	418
GnigEST010488	2570	DROME	Protein groucho	253336	0	72	909.057	753	548
GnigEST010494	2959	RAT	Mothers against decapentaplegic homolog 4	49689	0	65	670.233	612	403
GnigEST010497	2621	HUMAN	Pre-mRNA-processing factor 6	132939	0	82	1175.23	824	676
GnigEST010502	3857	MOUSE	Transmembrane 9 superfamily member 3	131656	0	84	894.419	575	486
GnigEST010504	4533	MOUSE	E3 ubiquitin-protein ligase HERC2	312357	0	82	655.21	447	368
GnigEST010512	3307	DROME	Actin-interacting protein 1	184350	0	84	909.827	602	509
GnigEST010517	3566	DROME	Proline dehydrogenase, mitochondrial	80325	0	79	793.112	580	460
GnigEST010526	6680	AEDAE	Myosin-VIIa	318328	0	63	986.867	1187	758
GnigEST010541	2489	MOUSE	Transmembrane 9 superfamily member 4	103891	0	73	750.355	626	457
GnigEST010549	2727	MOUSE	Aconitate hydratase, mitochondrial	72667	0	83	1178.31	761	639
GnigEST010557	2043	DROME	Exocyst complex component 6	165030	0	72	637.876	585	424
GnigEST010576	2273	DROME	Protein slit	175023	0	84	646.351	399	336
GnigEST010580	3730	HUMAN	FERM, RhoGEF and pleckstrin domain-containing protein 1	55992	0	57	763.066	1039	602
GnigEST010588	2588	HOMAM	Gelsolin, cytoplasmic	78180	0	64	721.079	761	489
GnigEST010600	3155	MACFA	Lysosomal alpha-mannosidase	219766	0	62	840.106	983	615
GnigEST010611	4447	BOVIN	NAD(P) transhydrogenase, mitochondrial	277975	0	72	1212.98	1058	771
GnigEST010612	2742	DROME	Glutamate dehydrogenase, mitochondrial	117897	0	88	913.679	562	499
GnigEST010614	2835	DROME	6-phosphofructokinase	247180	0	88	1263.83	777	687
GnigEST010621	3529	HUMAN	WD repeat-containing protein 19	290000	0	70	669.848	664	467
GnigEST010632	1279	PARLI	Tubulin beta chain	99466	0	90	724.161	422	381
GnigEST010637	7414	DROME	Target of rapamycin	245074	0	74	2440.23	2058	1543
GnigEST010639	4035	DROME	FACT complex subunit spt16	250770	0	77	1308.51	995	770
GnigEST010642	3701	MOUSE	Ankyrin repeat and BTB/POZ domain-containing protein 2	130784	0	63	414.461	559	355
GnigEST010643	7533	DROME	Furin-like protease 2	74719	0	77	1546.18	1041	807
GnigEST010645	2923	RAT	Glucosamine--fructose-6-phosphate aminotransferase [isomerizing] 2	232713	0	84	962.214	683	576
GnigEST010675	4783	DROME	Sodium/potassium-transporting ATPase subunit alpha	144770	0	91	1520.37	878	799
GnigEST010680	2838	CRIGR	Lysyl-tRNA synthetase	158552	0	84	785.408	504	427
GnigEST010700	5788	HUMAN	Midasin	145602	0	64	1323.53	1422	920
GnigEST010706	11858	HUMAN	DmX-like protein 1	365432	0	50	810.446	1483	747
GnigEST010710	7916	MOUSE	Protein PIEZO2	440459	0	48	684.1	1548	747
GnigEST010727	2735	RAT	NADH-ubiquinone oxidoreductase 75 kDa subunit, mitochondrial	300279	0	80	990.334	726	582
GnigEST010754	2113	CANFA	Vacuolar protein sorting-associated protein 52 homolog	223871	0	74	706.442	667	495
GnigEST010766	2136	DROME	Dual oxidase	189963	0	80	858.21	598	480
GnigEST010771	2313	MOUSE	Protein CLEC16A	261794	0	65	707.983	738	482
GnigEST010773	3235	HUMAN	Integrator complex subunit 6	164584	0	59	746.503	959	573
GnigEST010778	3435	DROME	Neurobeachin	287911	0	87	1085.48	679	591
GnigEST010816	2327	DROME	ADAM 17-like protease	71166	0	83	1098.58	701	582
GnigEST010818	3682	MOUSE	Serine/threonine-protein kinase N2	223941	0	62	776.548	903	565
GnigEST010823	3515	MOUSE	Histone deacetylase 6	140751	0	60	672.544	799	487
GnigEST010825	2441	XENLA	Polyadenylate-binding protein 1-A	299321	0	73	743.806	622	455
GnigEST010830	5531	HUMAN	Proteasome activator complex subunit 4	356215	0	58	1233.39	1763	1038
GnigEST010846	4566	HUMAN	DNA topoisomerase 1	68943	0	78	784.252	554	433
GnigEST010858	2197	MOUSE	Importin subunit alpha-4	118526	0	86	758.444	511	444
GnigEST010860	5700	HUMAN	TATA-binding protein-associated factor 172	65821	0	63	1140.95	1279	810
GnigEST010864	3541	HUMAN	AP-3 complex subunit beta-2	112919	0	69	745.347	719	499
GnigEST010867	3536	DROME	Myosin-IB	205436	0	71	1124	1035	738
GnigEST010876	3508	HUMAN	Ephrin type-A receptor 5	346566	0	60	830.091	1008	611
GnigEST010882	6138	HUMAN	Myosin-XVIIIa	131737	0	56	956.822	1554	876
GnigEST010891	6836	HUMAN	ATP-binding cassette sub-family A member 3	144886	0	50	806.979	1732	872
GnigEST010896	2375	PONAB	Aldehyde dehydrogenase, mitochondrial	222309	0	81	678.322	475	386
GnigEST010897	3887	DROME	Ca(2+)/calmodulin-responsive adenylate cyclase	89979	0	69	1032.32	948	656
GnigEST010898	4045	DROME	Protein RIC1 homolog	245850	0	62	892.878	1035	649
GnigEST010907	2850	RAT	Phosphoinositide 3-kinase regulatory subunit 4	200660	0	57	507.294	771	443
GnigEST010916	4008	XENLA	2-oxoglutarate dehydrogenase, mitochondrial	300925	0	77	1305.43	996	772
GnigEST010937	3658	HUMAN	Probable E3 ubiquitin-protein ligase HERC1	344756	0	62	924.85	1044	648
GnigEST010946	2583	BOVIN	GTP-binding protein 1	371775	0	77	691.034	539	416
GnigEST010950	4185	MOUSE	Probable phospholipid-transporting ATPase IA	101712	0	72	1259.2	1121	812
GnigEST010952	3596	MOUSE	Probable cation-transporting ATPase 13A3	256943	0	57	667.152	1042	594
GnigEST010956	2531	DROME	cGMP-dependent protein kinase, isozyme 2 forms cD4/T1/T3A/T3B	115600	0	83	1049.65	712	596
GnigEST010967	1297	DROME	Tubulin alpha-1 chain	4870	0	96	716.842	367	355
GnigEST010995	3794	DROME	Myosin heavy chain, muscle	322766	0	79	1699.1	1206	959
GnigEST011008	3186	MOUSE	Calcium-transporting ATPase type 2C member 1	67889	0	73	1041.95	901	662
GnigEST011038	1870	HUMAN	6-phosphogluconate dehydrogenase, decarboxylating	50285	0	82	712.22	481	395
GnigEST011050	3004	MOUSE	V-type proton ATPase 116 kDa subunit a isoform 1	167940	0	75	1022.69	844	633
GnigEST011051	5193	DROME	DE-cadherin	84861	0	66	1429.46	1446	957
GnigEST011053	2866	HUMAN	Focal adhesion kinase 1	69846	0	64	646.736	734	474
GnigEST011055	3331	DROME	E3 ubiquitin-protein ligase Su(dx)	155326	0	90	1058.13	590	532
GnigEST011082	3679	CHOFU	Ecdysone-inducible protein E75	90959	0	66	655.21	695	460
GnigEST011100	2946	MOUSE	E3 ubiquitin-protein ligase NEDD4	68275	0	62	713.761	745	469
GnigEST011103	3312	HUMAN	Superkiller viralicidic activity 2-like 2	183775	0	76	1179.85	966	738
GnigEST011128	4092	DROME	ATP-dependent helicase brm	53904	0	72	1483.39	1207	880
GnigEST011140	7848	HUMAN	Vacuolar protein sorting-associated protein 13D	305255	0	54	915.605	1447	793
GnigEST011146	4866	DROME	Inositol hexakisphosphate and diphosphoinositol-pentakisphosphate kinase	424128	0	90	1349.34	791	718
GnigEST011193	2360	MOUSE	Paraplegin	294557	0	65	635.18	688	454
GnigEST011202	4332	HUMAN	E3 ubiquitin-protein ligase HERC2	353776	0	62	1221.07	1470	918
GnigEST011214	4732	DROME	Calsyntenin-1	138711	0	60	739.954	922	555
GnigEST011270	5444	DROME	Serine/threonine-protein kinase Genghis Khan	240828	0	65	1523.45	1665	1083
GnigEST011277	11200	DROME	Titin	379694	0	61	1768.44	2183	1336
GnigEST011281	4083	HUMAN	Atrial natriuretic peptide receptor 1	179373	0	65	830.861	890	581
GnigEST011282	7691	HUMAN	Phosphatidylinositol 4-kinase alpha	373550	0	66	1754.18	1913	1267
GnigEST011286	6615	DROME	Ryanodine receptor 44F	54659	0	83	3257.23	2165	1818
GnigEST011288	4494	HUMAN	Intraflagellar transport protein 140 homolog	171480	0	54	803.127	1253	683
GnigEST011289	2096	DROME	Peripheral plasma membrane protein CASK	113457	0	77	832.402	644	501
GnigEST011291	4241	CHICK	Cytoplasmic aconitate hydratase	154397	0	80	1217.6	888	715
GnigEST011294	4701	DROME	Calcium-transporting ATPase sarcoplasmic/endoplasmic reticulum type	164749	0	92	1728.38	993	923
GnigEST011317	4310	DANRE	Splicing factor 3B subunit 3	263735	0	86	1912.89	1218	1057
GnigEST011321	4616	DROME	Protein strawberry notch	382049	0	79	786.949	588	465
GnigEST011338	2699	MOUSE	Dedicator of cytokinesis protein 1	303941	0	63	756.903	908	578
GnigEST011341	3095	DROME	Protein flightless-1	64208	0	79	1112.83	796	635
GnigEST011345	7068	DROME	Tyrosine-protein phosphatase Lar	103469	0	85	1756.11	1141	973
GnigEST011346	5023	RABIT	Very low-density lipoprotein receptor	87358	0	56	579.711	727	414
GnigEST011349	7981	HUMAN	Protein MICAL-3	416446	0	73	792.727	672	497
GnigEST011350	4777	MOUSE	Isoleucyl-tRNA synthetase, cytoplasmic	145980	0	77	1471.83	1125	873
GnigEST011354	2686	DANRE	E3 ubiquitin-protein ligase SMURF2	384857	0	66	812.372	740	494
GnigEST011372	3109	CRIGR	3-hydroxy-3-methylglutaryl-coenzyme A reductase	65092	0	64	837.41	915	587
GnigEST011418	2769	DROME	Muscle LIM protein Mlp84B	97957	0	75	692.189	495	376
GnigEST011424	6508	HUMAN	Probable E3 ubiquitin-protein ligase TRIP12	285280	0	68	973	966	658
GnigEST011435	4981	MOUSE	ATP-binding cassette sub-family A member 3	344319	0	48	669.078	1716	824
GnigEST011448	5524	DROME	Transient receptor potential cation channel CG34123	378280	0	77	1685.62	1271	990
GnigEST011462	1381	TRYCR	Ubiquitin-60S ribosomal protein L40	277480	0	95	640.958	356	339
GnigEST011464	8009	DROME	Spectrin beta chain	79537	0	80	3261.09	2355	1892
GnigEST011481	2138	DANRE	Triple functional domain protein	314544	0	67	598.971	645	434
GnigEST011485	2024	DROME	Probable medium-chain specific acyl-CoA dehydrogenase, mitochondrial	161291	0	87	642.499	406	356
GnigEST011487	4250	DROME	Extracellular domains-containing protein CG31004	244064	0	70	1274.61	1074	759
GnigEST011490	3428	ID	Dolichyl-diphosphooligosaccharide--protein glycosyltransferase subunit STT3A	115701	0	88	1142.87	695	618
GnigEST011491	1665	TORMA	Tubulin alpha chain	154650	0	81	642.499	449	364
GnigEST011497	4084	MOUSE	ATP-citrate synthase	161419	0	80	1519.6	1087	875
GnigEST011502	2653	CHICK	Ribosomal protein S6 kinase 2 alpha	107131	0	81	988.023	690	565
GnigEST011512	3799	DROME	Calcium-transporting ATPase sarcoplasmic/endoplasmic reticulum type	164749	0	92	1728.38	993	923
GnigEST011513	6696	DROME	Myosin heavy chain, non-muscle	91559	0	74	2442.15	1961	1470
GnigEST011535	3653	DROME	Maternal protein pumilio	169463	0	61	662.144	708	438
GnigEST011560	3844	DROME	Myosin heavy chain, muscle	322766	0	75	1611.28	1222	924
GnigEST011568	8288	HUMAN	Probable ubiquitin carboxyl-terminal hydrolase FAF-X	360238	0	70	2721.42	2501	1773
GnigEST011574	4641	HUMAN	Teneurin-4	325662	0	49	645.58	1498	744
GnigEST011578	1809	HUMAN	Ankyrin-2	419518	0	84	731.095	516	435
GnigEST011579	4289	DROME	Neurogenic locus Notch protein	162589	0	82	1194.49	681	563
GnigEST011580	4084	MOUSE	C-Jun-amino-terminal kinase-interacting protein 3	136407	0	53	842.417	1342	714
GnigEST011582	5981	DROME	Titin	379694	0	64	1730.3	1912	1237
GnigEST011600	3442	HUMAN	Protein transport protein Sec24C	300959	0	76	993.416	803	611
GnigEST011612	3882	DROME	Putative DNA helicase Ino80	246477	0	78	733.406	528	415
GnigEST011614	6394	DROME	Inositol 1,4,5-trisphosphate receptor	285679	0	72	1918.28	1670	1206
GnigEST011641	7021	DROME	Dystrophin, isoforms A/C/F/G/H	325213	0	72	1398.26	1225	888
GnigEST011647	3899	MOUSE	AP-1 complex subunit gamma-1	110860	0	70	902.894	845	596
GnigEST011669	11785	DROME	Laminin subunit alpha	231320	0	58	3081.97	3746	2209
GnigEST011677	5184	DROME	Patj homolog	245186	0	62	644.425	782	486
GnigEST011682	3446	DROYA	Glucose-6-phosphate isomerase	183452	0	84	842.803	553	466
GnigEST011692	2455	DROME	Enolase	109826	0	89	728.013	439	392
GnigEST011693	1933	DROME	ATP synthase subunit alpha, mitochondrial	119943	0	90	776.548	466	424
GnigEST011697	1604	ID	Actin-5C	1703	0	98	736.873	376	370
GnigEST011699	2335	DROME	Cytoplasmic dynein 1 intermediate chain	245228	0	75	782.711	621	471
GnigEST011707	2985	MOUSE	1,4-alpha-glucan-branching enzyme	129635	0	77	934.48	690	536
GnigEST011721	7611	XENLA	Lysine-specific demethylase 3A-A	302046	0	56	660.218	871	495
GnigEST011728	2008	BLADI	Cytochrome P450 4C1	147444	0	79	649.818	484	385
GnigEST011730	3426	DROME	Paramyosin, long form	134039	0	75	994.571	847	642
GnigEST011734	3040	DROME	Dynamin	48639	0	85	1192.56	788	674
GnigEST011739	1970	DROME	Protein ariadne-2	119336	0	73	671.003	500	369
GnigEST011752	5551	DROME	DNA-directed RNA polymerase I subunit RPA1	225490	0	65	791.186	877	572
GnigEST011779	3510	DROME	Probable multidrug resistance-associated protein lethal(2)03659	196603	0	59	613.609	816	486
GnigEST011781	6000	DROME	DNA-directed RNA polymerase II subunit RPB1	65063	0	92	2474.51	1405	1296
GnigEST011783	4667	DROME	Probable multidrug resistance-associated protein lethal(2)03659	196603	0	63	1130.93	1333	851
GnigEST011794	9090	RABIT	Sortilin-related receptor	90496	0	47	976.467	2198	1034
GnigEST011836	4394	DROME	Myosin heavy chain 95F	207943	0	75	1515.75	1245	935
GnigEST011842	11511	LOCMI	Apolipophorins	371701	0	49	1598.18	3413	1706
GnigEST011870	2643	DROME	Myosin heavy chain, muscle	322766	0	80	798.89	561	450
GnigEST011879	4428	HUMAN	Vacuolar protein sorting-associated protein 13D	305255	0	56	973.77	1502	847
GnigEST011881	10267	MOUSE	Serine/threonine-protein kinase SMG1	311218	0	53	992.26	1648	880
GnigEST011883	8844	HUMAN	Probable E3 ubiquitin-protein ligase HERC1	344756	0	63	1597.41	1764	1127
GnigEST011890	15715	HUMAN	Dystonin	439540	0	52	1857.42	3588	1889
GnigEST011904	9734	MOUSE	Transformation/transcription domain-associated protein	285580	0	76	1832.77	1490	1143
GnigEST011911	6826	HUMAN	DnaJ homolog subfamily C member 13	251762	0	69	1825.06	1799	1244
GnigEST011915	2590	MOUSE	DNA-directed RNA polymerase, mitochondrial	48479	0	61	686.797	785	486
GnigEST011918	6553	RAT	Protocadherin Fat 3	147518	0	59	645.966	922	548
GnigEST011926	5385	DROME	Protein piwi	120544	0	65	683.715	785	512
GnigEST011950	10179	CHICK	Fatty acid synthase	56367	0	69	1172.15	1141	792
GnigEST011954	4426	HUMAN	Cohesin subunit SA-1	289658	0	69	986.097	1009	703
GnigEST011960	2795	BOMMO	Translation elongation factor 2	315166	0	94	1493.02	818	771
GnigEST011974	4475	DROME	Probable multidrug resistance-associated protein lethal(2)03659	196603	0	62	837.795	1004	624
GnigEST011976	1562	DROME	Nicotinate phosphoribosyltransferase	244130	0	89	417.157	250	224
GnigEST011986	3035	DROME	Pyruvate kinase	70322	0	77	679.478	540	417
GnigEST012008	3309	DROME	Negative elongation factor B	105689	0	77	801.971	602	467
GnigEST012019	5334	CHICK	Multidrug resistance-associated protein 1	229288	0	62	862.062	1023	637
GnigEST012021	3267	MOUSE	Solute carrier family 12 member 2	126044	0	62	887.486	1068	670
GnigEST012039	11263	LOCMI	Apolipophorins	371701	0	49	1599.33	3413	1705
GnigEST012041	2106	DROME	Polypeptide N-acetylgalactosaminyltransferase 2	217190	0	81	721.85	486	398
GnigEST012061	5676	HUMAN	Plasma membrane calcium-transporting ATPase 3	294703	0	74	1346.64	1136	843
GnigEST012076	2727	XENLA	Long-chain-fatty-acid--CoA ligase ACSBG2	288734	0	67	660.218	682	458
GnigEST012096	1482	DROME	Nicotinate phosphoribosyltransferase	244130	0	87	678.707	437	382
GnigEST012100	10397	LOCMI	Apolipophorins	371701	0	51	1039.64	2026	1040
GnigEST012102	2851	XENLA	Long-chain-fatty-acid--CoA ligase ACSBG2	288734	0	70	676.011	652	458
GnigEST012134	3426	PONAB	Staphylococcal nuclease domain-containing protein 1	222217	0	69	932.169	916	640
GnigEST012143	3512	DROME	Sodium- and chloride-dependent GABA transporter ine	244436	0	69	717.227	655	452
GnigEST012160	6779	HUMAN	Multidrug resistance-associated protein 1	354082	0	69	1206.82	1207	834
GnigEST012174	3827	HUMAN	Peroxisomal multifunctional enzyme type 2	190175	0	65	701.434	739	487
GnigEST012181	4640	MOUSE	Probable phospholipid-transporting ATPase IA	101712	0	73	1218.76	1053	773
GnigEST012191	2451	HUMAN	Zinc finger protein 729	402859	0	61	600.512	549	339
GnigEST012229	6629	DROME	NADPH--cytochrome P450 reductase	91635	0	81	917.531	632	518
GnigEST012262	7602	HUMAN	ATP-binding cassette sub-family A member 3	144886	0	49	795.808	1766	873
GnigEST012270	4659	DROME	Heat shock protein 68	174017	0	92	1009.59	607	561
GnigEST012292	3651	XENLA	Pre-rRNA-processing protein TSR1 homolog	281437	0	63	706.442	804	512
GnigEST012299	3484	HUMAN	ER degradation-enhancing alpha-mannosidase-like 3	296466	0	67	776.163	786	532
GnigEST012304	7543	HUMAN	Fibrillin-2	295755	0	62	2562.33	2400	1511
GnigEST012319	4716	DROME	Transcription elongation factor SPT5	186541	0	75	1217.99	991	749
GnigEST012339	3444	DROME	5'-3' exoribonuclease 2 homolog	243431	0	69	1013.83	882	610
GnigEST012340	2763	DROME	Protein EFR3 homolog cmp44E	261808	0	65	763.837	847	553
GnigEST012356	2291	PONAB	Mitochondrial intermediate peptidase	222319	0	71	732.635	668	475
GnigEST012380	3060	DROME	Uncharacterized protein CG42248	424119	0	75	1102.81	876	662
GnigEST012456	2262	DANRE	Tyrosyl-tRNA synthetase, cytoplasmic	303426	0	82	588.571	403	331
GnigEST012459	2725	HUMAN	Inositol polyphosphate 5-phosphatase OCRL-1	166864	0	58	692.96	891	524
GnigEST012493	2263	DANRE	COP9 signalosome complex subunit 2	211272	0	91	754.977	443	404
GnigEST012508	2824	DROME	Catenin alpha	165705	0	85	1360.9	906	778
GnigEST012518	3907	HUMAN	5-oxoprolinase	208329	0	75	1607.04	1289	974
GnigEST012525	2119	DROME	Eye-specific diacylglycerol kinase	61239	0	72	850.121	704	511
GnigEST012532	3424	DROME	Chloride channel protein 2	247220	0	71	922.154	792	563
GnigEST012559	1795	XENLA	Beta-TrCP	76617	0	93	826.624	464	432
GnigEST012592	2801	ID	Cullin-2	111459	0	77	877.47	749	577
GnigEST012606	4488	HUMAN	Intron-binding protein aquarius	290140	0	81	1944.47	1407	1145
GnigEST012629	2443	HUMAN	Serine/threonine-protein kinase NLK	344581	0	86	651.358	418	361
GnigEST012631	3140	MOUSE	Multidrug resistance-associated protein 7	248142	0	60	857.825	1067	650
GnigEST012671	2416	HUMAN	Anoctamin-7	302155	0	69	456.447	425	296
GnigEST012675	1328	HUMAN	Beta-centractin	68580	0	94	674.47	376	357
GnigEST012705	3037	XENTR	Ubiquitin carboxyl-terminal hydrolase 20	334269	0	57	642.884	867	496
GnigEST012711	6897	DROME	CAD protein	144506	0	77	2902.85	2232	1730
GnigEST012715	3389	MOUSE	Integrator complex subunit 3	299475	0	69	927.546	976	679
GnigEST012726	1803	CHICK	Myotubularin-related protein 2	304588	0	81	765.763	548	445
GnigEST012727	2205	DROPS	Neutral ceramidase	21430	0	62	636.721	701	439
GnigEST012728	2078	DROPS	LMBR1 domain-containing protein 2 homolog	21374	0	70	685.641	653	461
GnigEST012748	1950	DROME	RAC serine/threonine-protein kinase	181932	0	79	729.939	525	419
GnigEST012750	3830	DROME	DNA-directed RNA polymerase II subunit RPB2	160747	0	95	2139.38	1149	1093
GnigEST012754	1720	DROME	Calcium/calmodulin-dependent protein kinase type II alpha chain	142137	0	86	850.507	519	451
GnigEST012756	3040	DROME	Lysine-specific demethylase lid	241031	0	68	919.457	802	552
GnigEST012761	2285	BOVIN	TFIIH basal transcription factor complex helicase XPD subunit	370658	0	85	1083.55	742	634
GnigEST012767	4158	HUMAN	Multiple epidermal growth factor-like domains protein 11	400312	0	58	840.491	760	444
GnigEST012770	4098	MOUSE	Cullin-associated NEDD8-dissociated protein 1	231232	0	79	1563.13	1218	965
GnigEST012776	3765	HUMAN	Ubiquitin carboxyl-terminal hydrolase 34	321193	0	54	540.806	920	503
GnigEST012972	2120	MOUSE	E3 ubiquitin-protein ligase TRIM23	156364	0	73	658.292	569	418
GnigEST012988	2273	DANRE	N-alpha-acetyltransferase 35, NatC auxiliary subunit	299451	0	67	682.559	700	470
GnigEST013171	1443	DROME	Probable histone-binding protein Caf1	110662	0	96	846.269	429	412
GnigEST013249	2355	DROGR	Nuclear cap-binding protein subunit 1	409132	0	75	653.67	505	383
GnigEST013301	1586	DROME	Eukaryotic translation initiation factor 2 subunit 3	57677	0	91	787.719	458	420
GnigEST013349	1849	MACFA	T-complex protein 1 subunit theta	306775	0	82	762.296	545	448
GnigEST013651	2012	HUMAN	Electron transfer flavoprotein-ubiquinone oxidoreductase, mitochondrial	345319	0	84	909.442	584	493
GnigEST013793	2708	HUMAN	Metastasis-associated protein MTA1	331507	0	62	669.848	785	489
GnigEST013861	6597	DROME	Putative vitellogenin receptor	146117	0	51	1024.23	1733	888
GnigEST013899	2294	DROME	Extracellular sulfatase SULF-1 homolog	100696	0	81	656.366	446	362
GnigEST013934	2056	HUMAN	Bifunctional purine biosynthesis protein PURH	78861	0	82	833.943	589	484
GnigEST014248	1748	AEDAE	RuvB-like helicase 1	318299	0	90	733.791	455	411
GnigEST014297	1674	ID	AP-1 complex subunit mu-1	179904	0	90	704.131	422	380
GnigEST014335	1654	XENLA	COP9 signalosome complex subunit 1	210466	0	80	651.744	486	393
GnigEST014395	1603	XENLA	RuvB-like 2	179901	0	90	728.398	461	415
GnigEST014444	1881	CHICK	T-complex protein 1 subunit eta	219912	0	87	814.683	524	458
GnigEST014445	2253	XENLA	ATPase family AAA domain-containing protein 3-B	300629	0	74	719.924	591	439
GnigEST014521	2029	DROME	Probable nucleolar GTP-binding protein 1	69069	0	76	831.247	652	502
GnigEST014531	2217	HUMAN	G-protein-signaling modulator 2	301672	0	71	659.062	633	453
GnigEST014687	1962	AEDTR	T-complex protein 1 subunit delta	127291	0	89	813.913	528	470
GnigEST014848	1697	MOUSE	F-box-like/WD repeat-containing protein TBL1XR1	143127	0	83	791.186	515	432
GnigEST014861	2778	HUMAN	Trifunctional enzyme subunit alpha, mitochondrial	242936	0	70	816.994	773	546
GnigEST014884	2869	MOUSE	Low-density lipoprotein receptor-related protein 6	57250	0	62	731.095	874	545
GnigEST014889	2795	HUMAN	NF-X1-type zinc finger protein NFXL1	284963	0	60	787.719	712	430
GnigEST014890	4000	HUMAN	Protein unc-13 homolog A	233130	0	80	1660.2	1219	987
GnigEST014905	3383	MOUSE	Attractin-like protein 1	234620	0	48	636.336	1180	572
GnigEST015006	3004	DROME	Serine/threonine-protein phosphatase 4 regulatory subunit 3	424149	0	87	1005.74	671	589
GnigEST015328	1659	HUMAN	Cysteine desulfurase, mitochondrial	130752	0	86	641.728	400	345
GnigEST015403	3647	DROME	Regulator of nonsense transcripts 1 homolog	131668	0	80	1489.94	1059	851
GnigEST015451	2358	BOVIN	Autophagy-related protein 9A	308121	0	68	653.284	617	423
GnigEST015494	2160	XENLA	DNA ligase 1	91579	0	74	843.188	692	518
GnigEST015632	2352	BOVIN	Very long-chain specific acyl-CoA dehydrogenase, mitochondrial	283020	0	75	737.643	601	456
GnigEST015731	1300	ID	26S protease regulatory subunit 10B	127544	0	96	683.715	375	363
GnigEST015807	2691	ID	T-complex protein 1 subunit epsilon	180988	0	87	821.617	540	472
GnigEST015935	2914	CHICK	E3 ubiquitin-protein ligase MIB2	219951	0	62	813.142	953	596
GnigEST016101	3737	MOUSE	Calpain-7	140989	0	64	814.683	828	537
GnigEST016103	5003	HUMAN	Glycogen debranching enzyme	131573	0	63	1385.93	1545	977
GnigEST016104	6972	HUMAN	Activating signal cointegrator 1 complex subunit 3	308152	0	72	1493.79	1288	937
GnigEST016156	1842	HUMAN	UPF0027 protein C22orf28	46266	0	92	875.159	497	460
GnigEST016323	2242	ANOST	Ring canal kelch homolog	200565	0	82	868.611	605	498
GnigEST016434	3940	HUMAN	Probable cation-transporting ATPase 13A1	178603	0	71	1304.66	1182	844
GnigEST016589	1903	DROME	Probable phenylalanyl-tRNA synthetase beta chain	115398	0	77	741.11	593	458
GnigEST016607	2655	DROMO	Ribosome biogenesis protein BOP1 homolog	409265	0	78	889.412	643	507
GnigEST016734	1621	RAT	NADH dehydrogenase [ubiquinone] iron-sulfur protein 2, mitochondrial	256332	0	85	688.337	431	370
GnigEST017230	2275	DROME	Signal recognition particle receptor subunit alpha homolog	122785	0	71	687.567	621	446
GnigEST017276	1251	HUMAN	DNA polymerase epsilon catalytic subunit A	262354	0	87	678.322	416	364
GnigEST017553	3118	HUMAN	Dynamin-1-like protein	138552	0	79	936.021	740	590
GnigEST017621	1730	CULQU	Eukaryotic translation initiation factor 3 subunit L	391034	0	77	724.161	543	421
GnigEST017669	1790	ID	Pre-mRNA-processing factor 19	172691	0	80	700.664	507	409
GnigEST017732	4075	DROME	Chaoptin	115580	0	64	1160.98	1308	841
GnigEST017799	1751	HUMAN	Low-density lipoprotein receptor-related protein 5	188874	0	74	693.73	577	427
GnigEST017871	2478	PONAB	Acyl-CoA synthetase short-chain family member 3, mitochondrial	222252	0	68	697.582	624	430
GnigEST017938	2460	ANOGA	Kinesin-like protein unc-104	375488	0	81	896.345	634	518
GnigEST017964	2875	PONAB	Aspartyl-tRNA synthetase, cytoplasmic	305046	0	83	676.011	484	404
GnigEST018005	2469	HUMAN	Methionyl-tRNA synthetase, cytoplasmic	149984	0	70	790.801	699	494
GnigEST018146	2354	HUMAN	ATP-binding cassette sub-family F member 3	276936	0	73	786.563	707	521
GnigEST018197	3448	HUMAN	Rap guanine nucleotide exchange factor 2	52794	0	64	904.82	1023	664
GnigEST018242	2319	DROME	60 kDa heat shock protein, mitochondrial	131982	0	87	822.387	558	486
GnigEST018313	2735	MOUSE	Ubiquitin carboxyl-terminal hydrolase 5	242257	0	63	753.436	869	549
GnigEST018460	2199	DROME	Conserved oligomeric Golgi complex subunit 4	102024	0	67	691.034	731	492
GnigEST018471	2523	DROME	DNA-directed RNA polymerase I subunit RPA2	168651	0	71	921.383	822	585
GnigEST018515	2386	DROME	Ubiquitin thioesterase trabid	246379	0	65	683.715	700	459
GnigEST018552	8464	MOUSE	Ankyrin repeat domain-containing protein 17	301164	0	75	895.575	757	570
GnigEST018556	3907	CHICK	PAB-dependent poly(A)-specific ribonuclease subunit 2	305813	0	59	916.376	1166	691
GnigEST018588	1573	MOUSE	Probable ATP-dependent RNA helicase DDX47	123441	0	89	649.432	413	369
GnigEST018629	3051	PIG	ATP-binding cassette sub-family F member 1	205738	0	79	730.709	562	446
GnigEST018733	2883	MOUSE	Cullin-4B	350273	0	78	1000.35	778	611
GnigEST018762	4366	HUMAN	Copper-transporting ATPase 1	293449	0	64	944.11	1079	697
GnigEST018769	2390	APIME	Trehalase	379682	0	82	652.514	433	358
GnigEST018771	2844	ID	V-type proton ATPase catalytic subunit A	282545	0	98	1148.65	608	597
GnigEST018777	2776	PIG	Endoplasmin	75805	0	69	844.729	792	549
GnigEST018778	2003	DROME	T-complex protein 1 subunit gamma	174130	0	88	826.624	544	479
GnigEST018789	4186	HUMAN	Ubiquitin carboxyl-terminal hydrolase 7	346636	0	74	1329.69	1111	832
GnigEST018836	1610	HUMAN	Exostosin-2	54138	0	72	634.024	541	394
GnigEST018879	4004	MOUSE	Peroxidasin homolog	234765	0	62	1246.49	1361	854
GnigEST018975	2506	XENTR	DNA replication licensing factor mcm5	262434	0	85	1092.8	739	635
GnigEST018982	2208	MOUSE	Protein arginine N-methyltransferase 5	96824	0	67	651.358	638	430
GnigEST019064	2568	MOUSE	Protein transport protein Sec23A	92110	0	85	1224.92	776	667
GnigEST019068	2569	SCHPO	Putative glutamine-dependent NAD(+) synthetase	149964	0	69	503.442	493	342
GnigEST019226	2468	PONAB	GMP synthase [glutamine-hydrolyzing]	223439	0	78	861.677	669	528
GnigEST019238	1928	DROME	Tyrosine-protein kinase Src42A	98153	0	85	845.114	526	451
GnigEST019785	3123	DROME	Glycogen phosphorylase	163264	0	88	1392.87	840	745
GnigEST019799	3908	MOUSE	Exportin-1	203645	0	86	1628.22	1068	921
GnigEST019801	2859	AEDAE	Adenylosuccinate synthetase	318312	0	86	664.84	422	366
GnigEST019809	2629	XENTR	SEC14-like protein 5	324718	0	69	476.863	482	334
GnigEST019818	5923	DROME	Transcription elongation factor SPT6	72775	0	61	1560.43	1770	1096
GnigEST019821	2564	DROME	DNA excision repair protein haywire	148660	0	87	1227.23	763	671
GnigEST019825	3238	HUMAN	E3 ubiquitin-protein ligase MIB1	93551	0	81	1524.61	1016	829
GnigEST019839	4018	DROME	Neuroglian	167006	0	75	1592.4	1237	929
GnigEST019848	2842	MOUSE	Transportin-1	330673	0	87	1442.94	894	786
GnigEST019871	2457	DROME	Dipeptidyl peptidase 3	120976	0	75	853.203	729	549
GnigEST019898	1920	DROME	Actin-related protein 2	240529	0	93	691.804	389	365
GnigEST019919	1817	MOUSE	Transportin-3	45522	0	71	646.351	594	422
GnigEST020427	1430	XENLA	26S protease regulatory subunit 7	87882	0	88	727.243	434	383
GnigEST020435	2317	DANRE	Delta-1-pyrroline-5-carboxylate dehydrogenase, mitochondrial	196562	0	78	694.501	534	421
GnigEST020441	2258	RABIT	Non-specific lipid-transfer protein	101073	0	77	674.855	529	411
GnigEST020452	1402	MANSE	26S protease regulatory subunit 6B	73435	0	91	717.227	416	381
GnigEST020460	2011	MOUSE	WD repeat-containing protein 26	356300	0	75	739.954	579	438
GnigEST020494	2691	PONAB	Nuclear pore complex protein Nup93	422627	0	61	651.358	824	504
GnigEST020500	2613	DROME	ATP-dependent RNA helicase Ddx1	183401	0	77	998.423	731	566
GnigEST020533	1619	DROPS	CDKAL1-like protein	21432	0	82	647.892	437	362
GnigEST020547	2136	MOUSE	Putative adenosylhomocysteinase 3	256044	0	90	774.622	445	404
GnigEST020658	1556	ID	AP-3 complex subunit mu-1	120632	0	87	657.522	417	365
GnigEST021223	1298	MANSE	V-type proton ATPase subunit d	186796	0	98	675.241	348	342
GnigEST021240	2657	HUMAN	Protein sel-1 homolog 1	95783	0	75	720.694	582	440
GnigEST021246	3845	DROME	Tripeptidyl-peptidase 2	59125	0	65	788.875	890	586
GnigEST021277	3731	DROME	Kinesin heavy chain	179776	0	78	1271.91	954	753
GnigEST021280	1770	DROME	Actin-related protein 3	244494	0	94	766.533	416	392
GnigEST021289	4190	BOVIN	Protein transport protein Sec24A	370578	0	73	855.129	781	574
GnigEST021295	3974	MOUSE	Afadin	360920	0	61	951.429	1187	732
GnigEST021319	2094	DROME	Probable ATP-dependent RNA helicase pitchoune	179408	0	85	731.095	473	403
GnigEST022329	1710	DROME	Lissencephaly-1 homolog	143606	0	85	649.432	411	351
GnigEST022352	1394	CHICK	WD40 repeat-containing protein SMU1	303678	0	92	733.791	423	393
GnigEST022375	2867	DROME	Amidophosphoribosyltransferase	91396	0	83	731.865	506	421
GnigEST022391	3267	BOVIN	Glycerol-3-phosphate dehydrogenase, mitochondrial	268392	0	74	823.543	721	540
GnigEST022397	5024	HUMAN	Kinase D-interacting substrate of 220 kDa	301523	0	65	971.459	1106	721
GnigEST022740	1622	HUMAN	Splicing factor 3A subunit 3	62942	0	76	684.1	502	386
GnigEST026216	1703	DROME	Inosine-5'-monophosphate dehydrogenase	48860	0	87	759.599	504	442
GnigEST026438	2862	MOUSE	26S proteasome non-ATPase regulatory subunit 2	95755	0	71	942.569	883	635
GnigEST027151	2508	DROME	Cysteinyl-tRNA synthetase, cytoplasmic	241850	0	70	854.358	737	521
GnigEST027770	4297	HUMAN	Ubiquitin-like modifier-activating enzyme 1	100891	0	78	1368.21	1061	830
GnigEST027793	2279	CHICK	AP-2 complex subunit mu-1	307462	0	92	765.377	441	409
GnigEST027895	1969	MOUSE	Importin subunit alpha-7	297651	0	82	752.281	532	439
GnigEST027913	3540	DROME	Membrane-associated protein Hem	190049	0	85	1607.42	1067	914
GnigEST030099	3151	DROME	FACT complex subunit Ssrp1	77808	0	69	715.301	619	428
